# Supplementary material for: Photochemical transformation of residential wood combustionemissions: dependence of organic aerosol composition on OHexposure
Source: Copernicus journal article supplement (doi:10.5194/acp-2019-1078), 2019-11-29
Supplement: Supplementary file 1 [file acp-2019-1078-supplement.zip]

## S1 Combustion conditions and primary emission

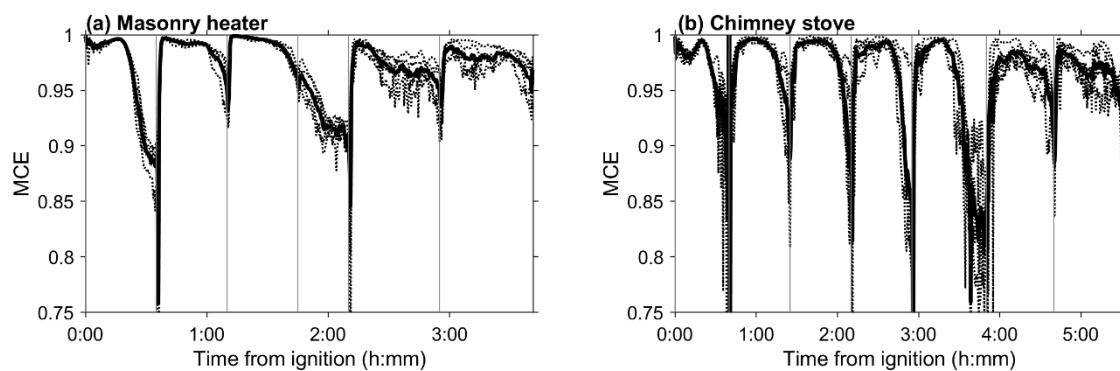

**Figure S1: Modified combustion efficiency ( $MCE = \Delta CO_2 / (\Delta CO_2 + \Delta CO)$ ) during experiments. Averages over all experiments are shown with the solid lines and different experiments are shown with the dotted lines.**

5 **Table S1: Compounds measured by FTIR and their reaction rates with OH ( $k_{OH}$ ) utilized for  $OHR_{ext}$  calculations.**

| Compound               | Formula                                      | VOC group   | CAS        | Range | unit  | $k_{OH}$<br>[cm <sup>3</sup> /molec. s] |
|------------------------|----------------------------------------------|-------------|------------|-------|-------|-----------------------------------------|
| Water vapor            | H <sub>2</sub> O                             |             | 7732-18-5  | 30    | vol-% | 2.10E-16                                |
| Carbon dioxide         | CO <sub>2</sub>                              |             | 124-38-9   | 25    | vol-% |                                         |
| Carbon monoxide        | CO                                           |             | 630-08-0   | 5000  | ppm   | 2.41E-13                                |
|                        |                                              |             |            | 2     | vol-% |                                         |
| Nitrous oxide          | N <sub>2</sub> O                             |             | 10024-97-2 | 200   | ppm   | 2.01E-16                                |
| Nitrogen monoxide      | NO                                           |             | 10102-43-9 | 1000  | ppm   | 1.00E-11                                |
| Nitrogen dioxide       | NO <sub>2</sub>                              |             | 19192-44-0 | 200   | ppm   | 1.06E-11                                |
| Sulfur dioxide         | SO <sub>2</sub>                              |             | 7446-09-5  | 1000  | ppm   | 1.31E-12                                |
| Carbonyl sulfide       | COS                                          |             | 483-58-1   | 100   | ppm   | 1.96E-15                                |
| Ammonia                | NH <sub>3</sub>                              |             | 7664-41-7  | 500   | ppm   | 1.57E-13                                |
| Hydrogen chloride      | HCl                                          |             | 7647-01-0  | 200   | ppm   | 7.86E-13                                |
| Hydrogen cyanide       | HCN                                          |             | 74-90-8    | 100   | ppm   | 3.13E-14                                |
| Hydrogen fluoride      | HF                                           |             | 7664-39-3  | 100   | ppm   |                                         |
| Methane                | CH <sub>4</sub>                              |             | 74-82-8    | 1000  | ppm   | 6.28E-15                                |
| Ethane                 | C <sub>2</sub> H <sub>6</sub>                | Alkane      | 74-84-0    | 200   | ppm   | 2.41E-13                                |
| Propane                | C <sub>3</sub> H <sub>8</sub>                | Alkane      | 74-98-6    | 200   | ppm   | 1.10E-12                                |
| Butane                 | C <sub>4</sub> H <sub>10</sub>               | Alkane      | 106-97-8   | 200   | ppm   | 2.33E-12                                |
| Pentane                | C <sub>5</sub> H <sub>12</sub>               | Alkane      | 109-66-0   | 200   | ppm   | 3.80E-12                                |
| Hexane                 | C <sub>6</sub> H <sub>14</sub>               | Alkane      | 110-54-3   | 200   | ppm   | 5.20E-12                                |
| Heptane                | C <sub>7</sub> H <sub>16</sub>               | Alkane      | 142-82-5   | 200   | ppm   | 6.76E-12                                |
| Octane                 | C <sub>8</sub> H <sub>18</sub>               | Alkane      | 111-65-9   | 200   | ppm   | 7.43E-12                                |
| Acetylene              | C <sub>2</sub> H <sub>2</sub>                | Unsaturated | 75-86-2    | 200   | ppm   | 7.75E-13                                |
| Ethylene               | C <sub>2</sub> H <sub>4</sub>                | Unsaturated | 74-85-1    | 200   | ppm   | 8.51E-12                                |
| Propene                | C <sub>3</sub> H <sub>6</sub>                | Unsaturated | 115-07-1   | 200   | ppm   | 3.01E-11                                |
| 1,3-Butadiene          | C <sub>4</sub> H <sub>6</sub>                | Unsaturated | 106-99-0   | 200   | ppm   | 6.93E-11                                |
| Benzene                | C <sub>6</sub> H <sub>6</sub>                | Aromatic    | 71-43-2    | 200   | ppm   | 1.28E-12                                |
| Toluene                | C <sub>7</sub> H <sub>8</sub>                | Aromatic    | 108-88-3   | 200   | ppm   | 6.16E-12                                |
| m-Xylene               | C <sub>8</sub> H <sub>10</sub>               | Aromatic    | 108-38-3   | 200   | ppm   | 2.45E-11                                |
| o-Xylene               | C <sub>8</sub> H <sub>10</sub>               | Aromatic    | 95-47-6    | 200   | ppm   | 1.47E-11                                |
| p-Xylene               | C <sub>8</sub> H <sub>10</sub>               | Aromatic    | 106-42-3   | 200   | ppm   | 1.52E-11                                |
| 1,2,3-Trimethylbenzene | C <sub>9</sub> H <sub>12</sub>               | Aromatic    | 526-73-8   | 200   | ppm   | 2.89E-11                                |
| 1,2,4-Trimethylbenzene | C <sub>9</sub> H <sub>12</sub>               | Aromatic    | 95-63-6    | 200   | ppm   | 3.16E-11                                |
| 1,35-Trimethylbenzene  | C <sub>9</sub> H <sub>12</sub>               | Aromatic    | 106-42-3   | 200   | ppm   | 5.98E-11                                |
| Formic acid            | CH <sub>2</sub> O                            | Oxygenated  | 64-18-6    | 200   | ppm   | 4.50E-13                                |
| Acetic acid            | C <sub>2</sub> H <sub>4</sub> O <sub>2</sub> | Oxygenated  | 64-19-7    | 200   | ppm   | 6.69E-13                                |
| Formaldehyde           | CHOH                                         | Oxygenated  | 50-0-0     | 200   | ppm   | 9.38E-12                                |
| Acetaldehyde           | C <sub>2</sub> H <sub>4</sub> O              | Oxygenated  | 75-07-0    | 200   | ppm   | 1.63E-11                                |
| Methanol               | CH <sub>4</sub> O                            | Oxygenated  | 67-56-1    | 500   | ppm   | 9.28E-13                                |
| Ethanol                | C <sub>2</sub> H <sub>6</sub> O              | Oxygenated  | 64-17-5    | 500   | ppm   | 3.24E-12                                |
| Propanol               | C <sub>3</sub> H <sub>8</sub> O              | Oxygenated  | 71-23-8    | 500   | ppm   | 5.82E-12                                |

**Table S2: Average ( $\pm$  standard deviation) concentrations of gaseous emissions measured by FTIR for each experiment type (five experiments each).**

| Compound          | unit                | Masonry heater |                 | Chimney stove   |                | p*                                  | p*                                  | p**                                             |
|-------------------|---------------------|----------------|-----------------|-----------------|----------------|-------------------------------------|-------------------------------------|-------------------------------------------------|
|                   |                     | S-5%           | S-22%           | B-17%           | S-22%          | Masonry heater;<br>S-5% v.<br>S-22% | Chimney stove;<br>B-17% v.<br>S-22% | S-22%;<br>Masonry heater<br>v. Chimney<br>stove |
| Water vapor       | vol-%               | 4.5 $\pm$ 0.3  | 4.1 $\pm$ 0.4   | 7.2 $\pm$ 0.4   | 6.4 $\pm$ 0.5  | <0.01                               | <0.01                               | <0.01                                           |
| Carbon dioxide    | vol-%               | 4.6 $\pm$ 0.1  | 3.26 $\pm$ 0.08 | 6.2 $\pm$ 0.3   | 5.9 $\pm$ 0.4  | <0.01                               | 0.05                                | <0.01                                           |
| Carbon monoxide   | ppm                 | 638 $\pm$ 26.5 | 735 $\pm$ 129   | 1680 $\pm$ 249  | 1880 $\pm$ 144 | 0.24                                | 0.28                                | <0.01                                           |
| Nitrogen monoxide | ppm                 | 25.6 $\pm$ 1.8 | 21.4 $\pm$ 2.6  | 45.9 $\pm$ 2.9  | 31.6 $\pm$ 3.7 | <0.01                               | <0.01                               | <0.01                                           |
| Nitrogen dioxide  | ppm                 | 1.0 $\pm$ 0.4  | 2.7 $\pm$ 1.1   | 1.3 $\pm$ 0.7   | 2.6 $\pm$ 1.6  | 0.03                                | 0.08                                | 0.98                                            |
| Sulfur dioxide    | ppm                 | 0.5 $\pm$ 0.3  | 0.6 $\pm$ 0.3   | 1.4 $\pm$ 0.3   | 0.9 $\pm$ 0.1  | 0.05                                | <0.01                               | 0.1                                             |
| Ammonia           | ppm                 | 1 $\pm$ 0.3    | 1.9 $\pm$ 0.3   | 6.2 $\pm$ 0.4   | 5.1 $\pm$ 0.5  | <0.01                               | 0.01                                | <0.01                                           |
| Methane           | mgC m <sup>-3</sup> | 10.5 $\pm$ 0.5 | 23.6 $\pm$ 5.6  | 28.7 $\pm$ 4.5  | 46.3 $\pm$ 4.4 | <0.01                               | 0.01                                | <0.01                                           |
| Non-methane VOCs  | mgC m <sup>-3</sup> | 42.6 $\pm$ 9.2 | 101 $\pm$ 24.6  | 89.4 $\pm$ 11.3 | 148.3 $\pm$ 23 | 0.01                                | <0.01                               | 0.05                                            |
| Alkanes           | mgC m <sup>-3</sup> | 9.7 $\pm$ 2.6  | 23.8 $\pm$ 6.6  | 16.9 $\pm$ 3    | 29.5 $\pm$ 6.7 | <0.01                               | 0.01                                | 0.31                                            |
| Unsaturated       | mgC m <sup>-3</sup> | 12.8 $\pm$ 2.9 | 33.1 $\pm$ 8.1  | 30.8 $\pm$ 4.7  | 54.2 $\pm$ 5.4 | <0.01                               | <0.01                               | <0.01                                           |
| Aromatics         | mgC m <sup>-3</sup> | 14.2 $\pm$ 3.5 | 20.7 $\pm$ 2.6  | 27.9 $\pm$ 4.9  | 36.0 $\pm$ 3.4 | 0.02                                | 0.02                                | <0.01                                           |
| Oxygenated        | mgC m <sup>-3</sup> | 5.6 $\pm$ 1.2  | 21.9 $\pm$ 8.1  | 13.3 $\pm$ 0.6  | 27.1 $\pm$ 8.9 | 0.01                                | 0.04                                | 0.51                                            |

\* paired Student's t-test; comparison of averages of the consecutive experiments; \*\* unpaired Student's t-test of independent experiments

(a) Masonry heater

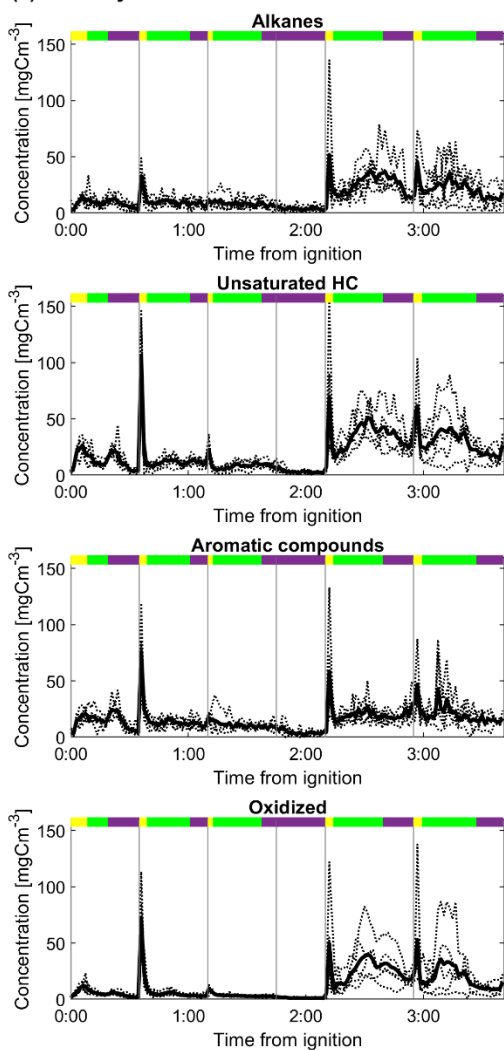

(b) Chimney stove

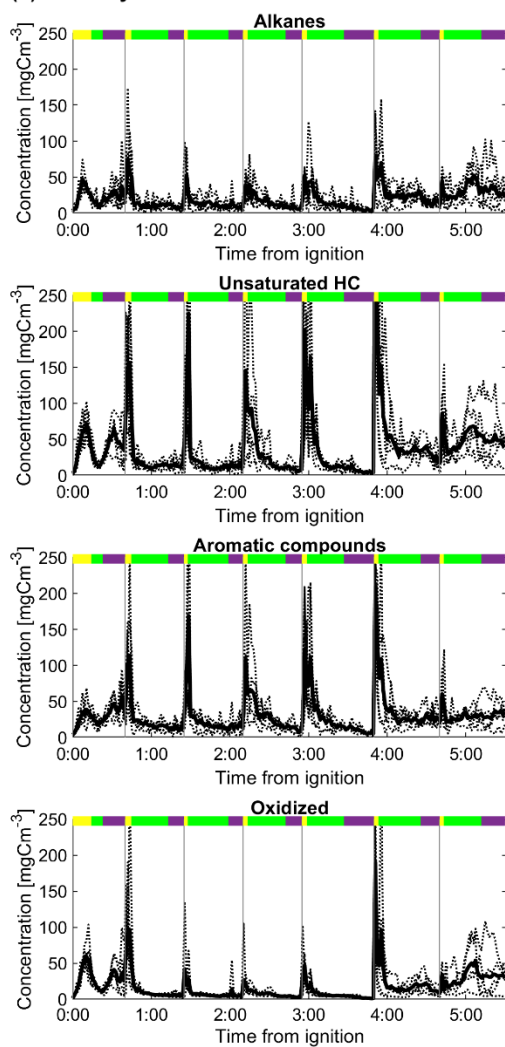

10

**Figure S2: Timeseries of VOC emissions from (a) masonry heater and (b) chimney stove for the four VOC groups. Average lengths of the combustion phases are marked on the top panel with the yellow (ignition), green (flaming), and purple (burnout).**

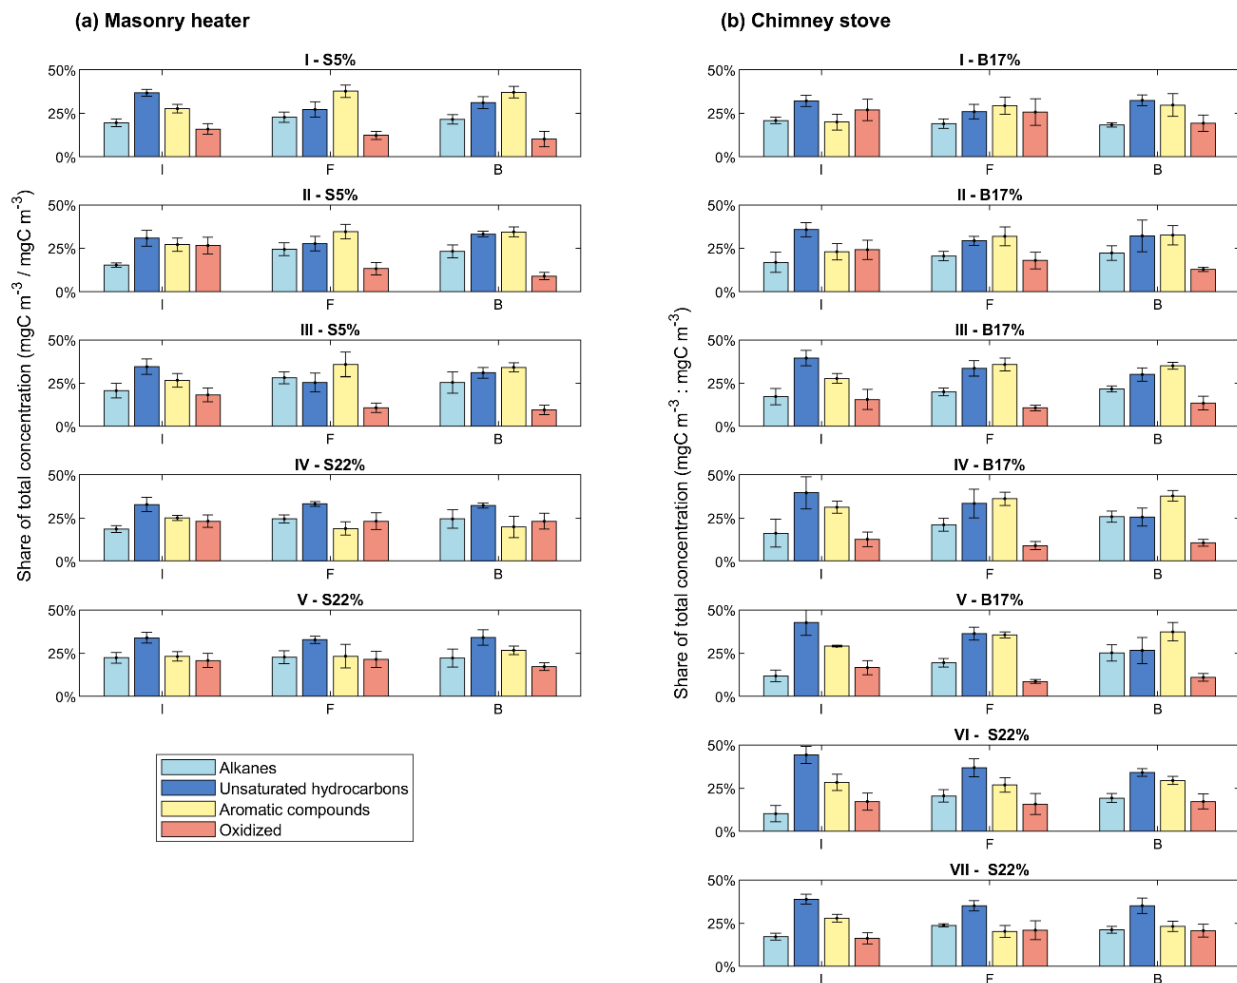

15 **Figure S3: Average shares of the VOC groups at different combustion phases (I = ignition, F = flaming, B = burnout) for each batch (I-V for masonry heater, I-VII for chimney stove) as a relation to the total VOC concentration ( $\text{mgC m}^{-3} / \text{mgC m}^{-3}$ ) measured by FTIR from the fresh exhaust. Error bars denote standard deviations.**

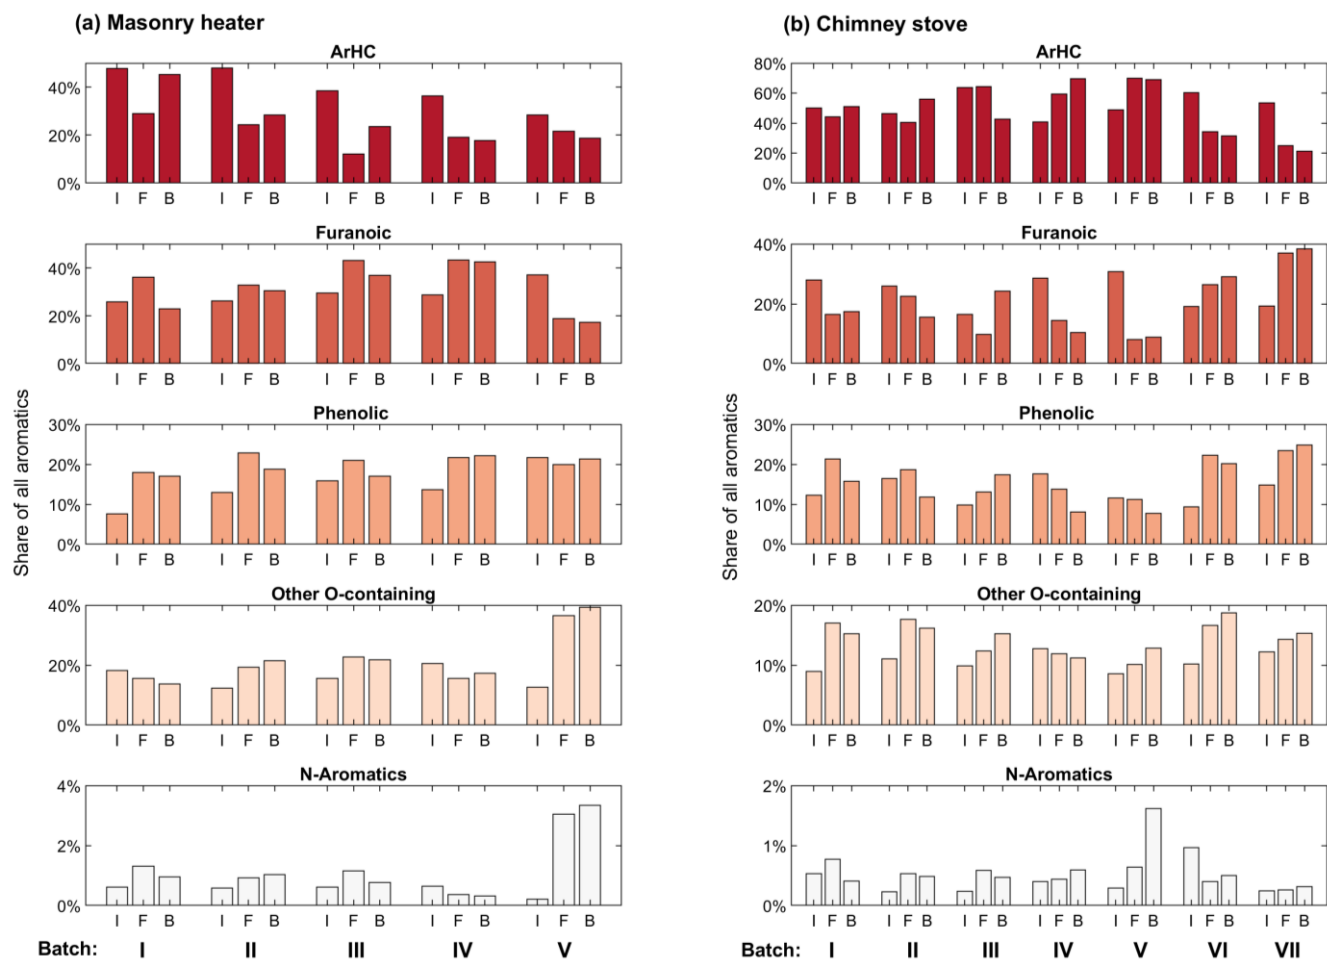

20 **Figure S4: Shares of aromatic compound groups measured by the PTR-ToF-MS from unaged aerosol, in relation to the total aromatic concentration (ppm/ppm) during different combustion phases (I = ignition, F = flaming, B = burnout) for each batch.**

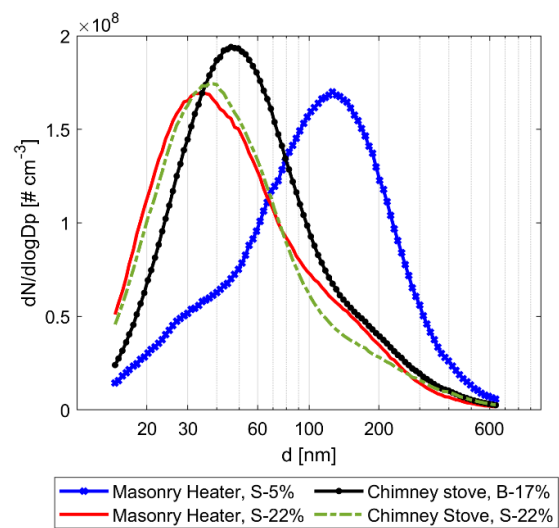

**Figure S5: Average size distributions in the primary exhaust (dry, 13 % O<sub>2</sub>) measured by SMPS.**

## S2 Conditions in PEAR

### 25 S2.1 External OH reactivity

External OH reactivity ( $\text{OHR}_{\text{ext}} = \sum k_i \cdot c_i$ ) was calculated from the compounds measured by FTIR from the primary exhaust, using their reaction rate constants with OH ( $k_i$ ; Table S1) and dilution corrected concentrations ( $c_i$ ) in the PEAR.

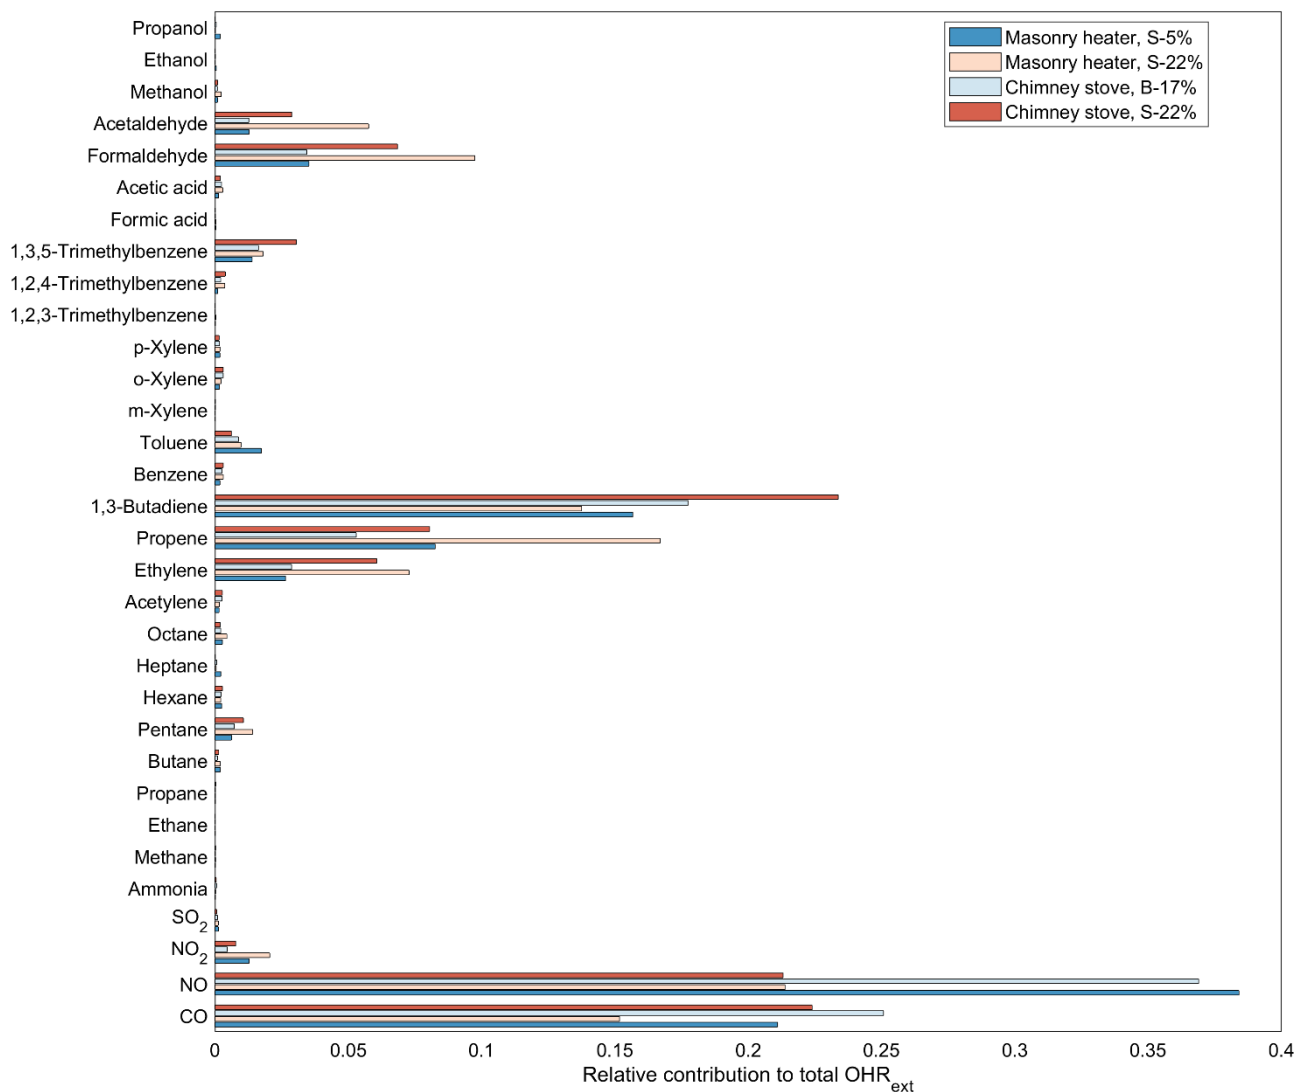

Figure S6: Average relative contributions of the measured gaseous compounds to the total  $\text{OHR}_{\text{ext}}$ .



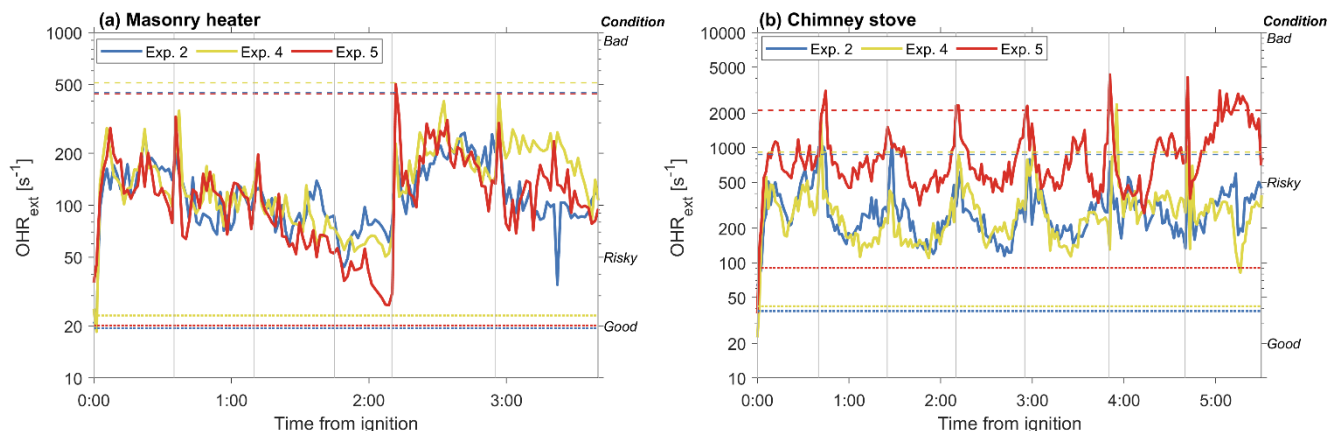

**Figure S7: External OH reactivity in the PEAR for the compounds measured by FTIR during photochemical aging experiments. Risk levels for  $OHR_{ext}$ , determined by Peng and Jimenez (2017), are marked with dotted (good/risky:  $\frac{Flux_{254nm} \text{ exposure}}{OH \text{ exposure}} > 4E5 \text{ cm s}^{-1}$ ) and dashed (risky/bad:  $\frac{Flux_{254nm} \text{ exposure}}{OH \text{ exposure}} > 1E7 \text{ cm s}^{-1}$ ) lines for each experiment.**

## S2.2 Fate of low-volatility organic compounds in the PEAR

Estimations of the LVOC fates in the PEAR were done based on Palm et al. (2016). Three possible pathways for LVOC depletion in the PEAR were considered: condensation onto particles, reactions with OH, and condensation onto walls of the PEAR. The rest exit the PEAR in the gas-phase after which they are expected to condense on the walls of sampling lines.

The LVOC lifetime due to aerosol losses ( $\tau_{aer}$ ) was calculated using Eq. (S1):

$$\tau_{aer} = \frac{1}{CS} \quad (S1)$$

where condensation sink ( $CS$ ,  $s^{-1}$ ; Fig 4) was calculated according to Lehtinen et al. (2003), using an average of the particle size distributions before and after the PEAR. The diffusion coefficient in use ( $D$ ;  $7 \times 10^{-6} \text{ m}^2 \text{ s}^{-1}$ ) was chosen as representative for oxidised,  $\sim 200 \text{ g mol}^{-1}$  molecules (Tang et al., 2015).

LVOC lifetime due to wall losses ( $\tau_{wall}$ ) was calculated with Eq. (S2):

$$\tau_{wall} = \left( \frac{A}{V} * \frac{2}{\pi} \sqrt{k_e D} \right)^{-1} \quad (S2)$$

$\tau_{wall}$  depends on the area-to-wall ratio ( $\frac{A}{V}$ ), which in the PEAR is  $2.28 \text{ m}^2 : 0.139 \text{ m}^3 = 16.4 \text{ m}^{-1}$ . The applied eddy diffusion coefficient,  $k_e$ , was  $0.0036 \text{ s}^{-1}$ , similarly to Palm et al. (2016).  $\tau_{wall}$  was constant (603 s) for all of the PEAR experiments.

Lifetime for LVOCs due to reactions with OH radicals was calculated with Eq. (S3):

$$\tau_{OH} = \frac{5}{k_{OH} * [OH]} \quad (S3)$$

based on the estimations that LVOCs as a total have an OH reaction rate ( $k_{OH}$ ) of  $1 \times 10^{-11} \text{ cm}^3 \text{ molec}^{-1} \text{ s}^{-1}$  and that it takes five such reactions for LVOC fragmentation into higher-volatility compounds.

The resulting total lifetime was calculated with Eq. (S4):

$$\tau_{total} = \left( \frac{1}{\tau_{aer}} + \frac{1}{\tau_{wall}} + \frac{1}{\tau_{OH}} \right)^{-1} \quad (S4)$$

from which the fraction of each pathway ( $F_x$ , where footnote denotes the degradation pathway: aerosol, wall, or OH) to the total loss was derived with eq. (S5).

$$F_x = (1 - F_{exit}) * \frac{\tau_x^{-1}}{\tau_{total}^{-1}} \quad (S5)$$

The fraction of LVOCs exiting the PEAR in gas-phase ( $F_{exit}$ ) was by eq. (S6):

$$F_{exit} = e^{-\frac{RT}{\tau_{total}^{-1}}} \quad (S6)$$

with the residence time (RT) being 139s for the 60lpm flow rate.

### S2.3 Photochemical exposure in PEAR

OH exposure during photochemical aging was measured directly from the decay of added butanol-*d*9, similarly to Barnet et al. (2012). Timeseries for the OH exposures during each experiment are shown in Figure S8.

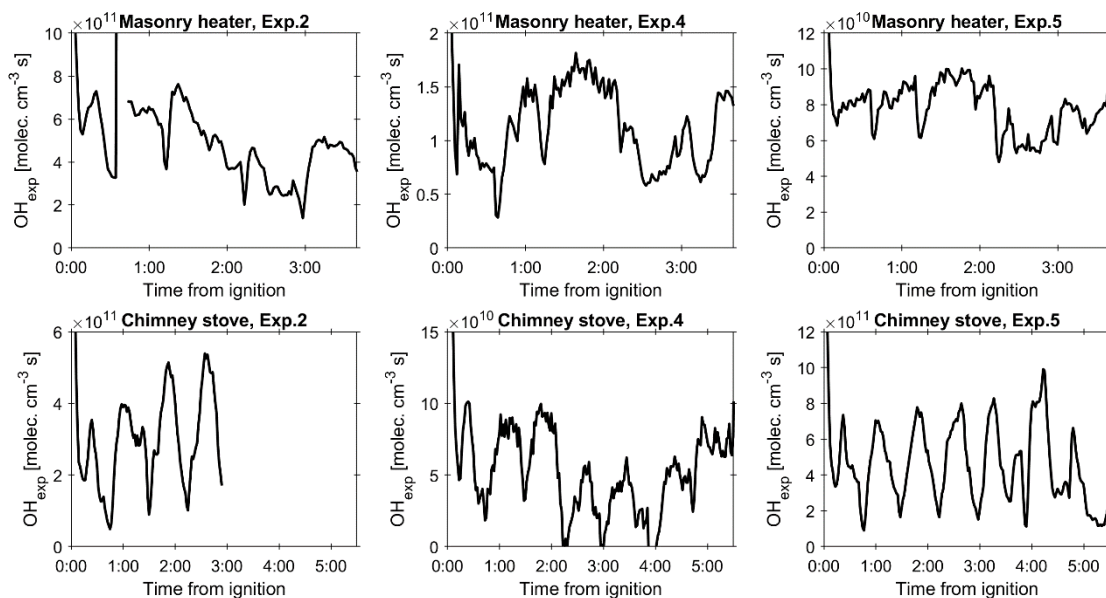

**Figure 8: OH exposure during photochemical aging experiments.**

The relevance of other reaction pathways in the PEAR, including photolysis as well as exposure to ozone, excited singlet oxygen ( $O(^1D)$ ), and triplet atomic oxygen ( $O(^3P)$ ), was estimated based on the estimation equations by Peng et al. (2016) (Table S3). The conditions in the PEAR were assessed utilising the directly measured OH exposure ( $OH_{exp}$ ), initial  $O_3$  input concentration ( $O_{3, init}$ ), residence time in PEAR (RT; 139s), and water mixing ratio ( $H_2O$ ; 0.015 for 45 % relative humidity). Average exposures during each experiment are shown in Table S4, and their relevance towards ambient atmospheric conditions are displayed in Figure S11.

**Table S3: Estimation equations used for determination of photon flux ( $F_{254nm}$ ),  $O(^3P)$ ,  $O(^1D)$ , and  $O_3$  exposures, based on Peng et al. (2016).**

| Reactant            | Exposure estimation equation                                                                                                                                                                                                                                                                                                                                                                                                        | eq.no |
|---------------------|-------------------------------------------------------------------------------------------------------------------------------------------------------------------------------------------------------------------------------------------------------------------------------------------------------------------------------------------------------------------------------------------------------------------------------------|-------|
| Photon flux         | $flux_{254nm,exp} = 10^{\left(1.0238 + \sqrt{(-1.0238)^2 - 4 * 0.060786 * c}\right) / 2 * 0.060786}$ $\text{where } c = - \left[ \log_{10} \left( OH_{exp} * \frac{180}{RT} \right) - \left\{ 15.514 + 0.79292 * \log_{10}(H_2O) + 0.023076 * \log_{10}(H_2O)^2 - \right. \right.$ $\left. \left. \log_{10} \left( 1 + e^{\frac{-0.42602 - \log_{10} \left( \frac{O_3,init}{OHR_{ext}} \right)}{0.39479}} \right) \right\} \right]$ | (S7)  |
| $O(^1D)$            | $\log_{10}(O(^1D)_{exp}) = 3.7371 + 0.1608 * \log_{10} \left( -\log_{10} d^{\frac{180}{RT}} \right)$ $- 1.1344 * \log_{10} H_2O + 0.59179 * \log_{10} O_{3,init}$ $- 0.17019 * \log_{10} \left( -\log_{10} d^{\frac{180}{RT}} \right) * \log_{10} H_2O$ $- 0.37983 * \log_{10} \left( -\log_{10} d^{\frac{180}{RT}} \right)^2 + 0.099941 * \log_{10} OHR_{ext}$                                                                     | (S8)  |
| $O(^3P)$            | $\log_{10}(O(^3P)_{exp}) = 7.6621 + 0.16135 * \log_{10} \left( -\log_{10} d^{\frac{180}{RT}} \right)$ $- 1.1342 * \log_{10} H_2O + 0.59182 * \log_{10} O_{3,init}$ $- 0.17007 * \log_{10} \left( -\log_{10} d^{\frac{180}{RT}} \right) * \log_{10} H_2O$ $- 0.3797 * (\log_{10} (-\log_{10} d^{\frac{180}{RT}}))^2 + 0.099902 * \log_{10} (OHR_{ext})$                                                                              | (S9)  |
| $O_3$               | $\log_{10}(O_{3,exp}) = 15.559 + \log_{10} O_{3,init} + 0.42073 * \log_e (d^{180/RT})$                                                                                                                                                                                                                                                                                                                                              | (S10) |
| for eq. S8-<br>S10: | $d = \left( 10^{-10}^{\log_{10}(OH_{exp}/RT * 180) - 13.322 + 0.22101 * \left( \frac{OHR_{ext}}{O_{3,init}} \right)^{0.43529}} \right)^{RT/180}$                                                                                                                                                                                                                                                                                    | (S11) |

75 **Table S4: Average exposures to radicals in the PEAR during photochemical aging experiments.**

|                | Exp. | O <sub>3</sub> input<br>[ppm] | photon flux<br>[photons cm <sup>-2</sup> ] | Fuel   | OH <sub>exp</sub><br>[# s cm <sup>-3</sup> ] | O( <sup>1</sup> D) <sub>exp</sub><br>[# s cm <sup>-3</sup> ] | O( <sup>3</sup> P) <sub>exp</sub><br>[# s cm <sup>-3</sup> ] | O <sub>3</sub> exp<br>[# s cm <sup>-3</sup> ] |
|----------------|------|-------------------------------|--------------------------------------------|--------|----------------------------------------------|--------------------------------------------------------------|--------------------------------------------------------------|-----------------------------------------------|
| Masonry heater | 2    | 2.3                           | 8.3E+15                                    | S-5%   | 5.8E+11                                      | 1.28E+6                                                      | 1.07E+10                                                     | 2.42E+15                                      |
|                |      |                               |                                            | S-22%  | 3.5E+11                                      | 1.16E+6                                                      | 9.75E+9                                                      | 2.97E+15                                      |
|                | 4    | 2.2                           | 1.9E+15                                    | S-5%   | 8.1E+10                                      | 3.74E+5                                                      | 3.14E+9                                                      | 5.85E+15                                      |
|                |      |                               |                                            | S-22%  | 6.3E+10                                      | 6.25E+5                                                      | 5.25E+9                                                      | 4.87E+15                                      |
|                | 5    | 1.8                           | 1.36E+15                                   | S-5%   | 8.1E+10                                      | 2.88E+5                                                      | 2.42E+9                                                      | 4.99E+15                                      |
|                |      |                               |                                            | S-22%  | 6.3E+10                                      | 3.83E+5                                                      | 3.22E+9                                                      | 4.65E+15                                      |
| Chimney stove  | 2    | 4.3                           | 5.42E+15                                   | B-17%  | 3.1E+11                                      | 1.51E+6                                                      | 1.27E+10                                                     | 6.86E+15                                      |
|                |      |                               |                                            | S-22%* | not meas.                                    | not meas.                                                    | not meas.                                                    | not meas.                                     |
|                | 4    | 3.6                           | 1.09E+15                                   | B-17%  | 5.4E+10                                      | 3.08E+5                                                      | 2.59E+09                                                     | 1.08E+16                                      |
|                |      |                               |                                            | S-22%  | 6.1E+10                                      | 4.10E+5                                                      | 3.45E+09                                                     | 1.03E+16                                      |
|                | 5    | 11                            | 1.06E+16                                   | B-17%  | 5.0E+11                                      | 4.22E+6                                                      | 3.55E+10                                                     | 9.75E+15                                      |
|                |      |                               |                                            | S-22%  | 5.0E+11                                      | 5.04E+6                                                      | 4.24E+10                                                     | 7.47E+15                                      |

\* Direct OH exposure measurements not available for Chimney stove Exp. 2 S-22%; approximately similar as in Exp.2 B-17%.

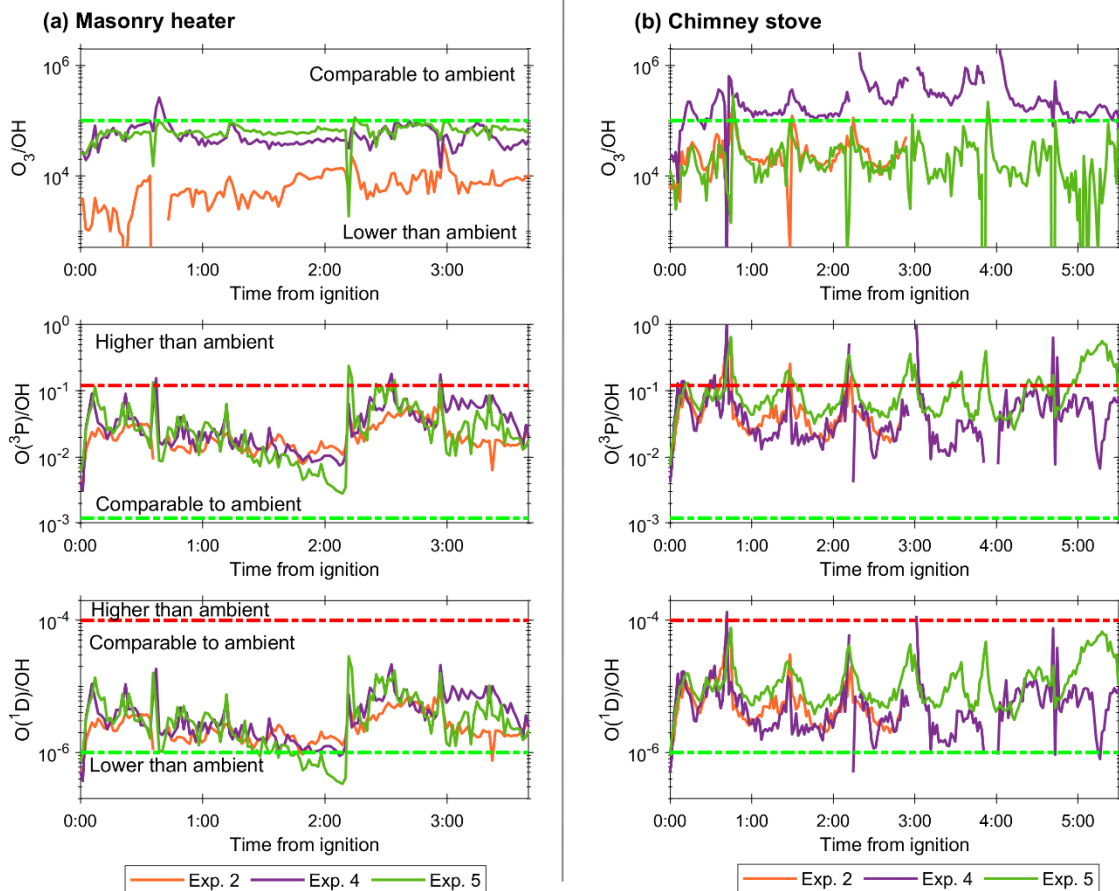

**Figure S9: Ratios of alternative reaction pathways to the OH exposure. Ambient ratios as in Peng et al. (2016)**

80 As an example of the relevance of the different reaction pathways, their importance towards the VOC fates was assessed for two important SOA precursors common for RWC: benzene and toluene (Fig. S10). The ratio of degradation by photolysis ( $D_{flux}$ ) and reactions with alternative oxidants ( $D_x$ ) to the degradation by OH reactions were calculated with Eq. (S12-S13), which show the inverse relationship between the importance of the pathway and the ratio of the photoabsorption cross section ( $\sigma_{abs}$ ) or reaction rate of the compound with the considered radical ( $k[X]_{VOC}$ ) to its reaction rate with OH ( $k[OH]_{VOC}$ ).

85

$$D_{flux} = \frac{flux_{exp}}{[OH]_{exp}} * \frac{\sigma_{abs,VOC}}{k[OH]_{VOC}} \quad (S12)$$

$$D_x = \frac{[X]_{exp}}{[OH]_{exp}} * \frac{k[X]_{VOC}}{k[OH]_{VOC}} \quad (S13)$$

90 The absorption cross sections and reactivities used for the exemplary pathway estimations for toluene and benzene are listed in Table S5. The total degradation in relation to degradation by OH was calculated with eq. (S14) by considering reactions with OH, O<sub>3</sub>, and O(<sup>3</sup>P) and photolysis.

$$D_{total} = 1 + D_{flux} + D_{O_3} + D_{O(^3P)} \quad (S14)$$

**Table S5: Absorption cross sections ( $\sigma_{abs}$ , cm<sup>2</sup> molecule<sup>-1</sup>) and reaction rates [cm<sup>3</sup> molec.<sup>-1</sup> s] of major RWC VOCs towards oxidants in PEAR**

|                       | Benzene               | Toluene               | Phenol                | Furan                 | Acetic acid           | Acetaldehyde          | Isoprene              | References                                                                                                       |
|-----------------------|-----------------------|-----------------------|-----------------------|-----------------------|-----------------------|-----------------------|-----------------------|------------------------------------------------------------------------------------------------------------------|
| $\sigma_{abs, 254nm}$ | 3.0E-19               | 2.3E-19               | 1.6E-18               | 7.1E-19*              | 4.8E-21               | 1.5e-20               | 5.3E-20               | Keller-Rudek et al. (2015); * at 225nm                                                                           |
| k[OH]                 | 1.8E-12 <sup>A</sup>  | 6.16E-12 <sup>A</sup> | 1.00E-11 <sup>B</sup> | 4.04E-11 <sup>A</sup> | 8.00E-13 <sup>C</sup> | 1.62E-11 <sup>A</sup> | 1.00E-10 <sup>A</sup> | A: (Atkinson, 1986), B: (Baulch et al., 1992); C: (Atkinson. et al., 2001)                                       |
| k[O <sub>3</sub> ]    | 1.72E-22 <sup>A</sup> | 3.90E-22 <sup>A</sup> |                       | 2.42E-18 <sup>B</sup> |                       | 3.40E-20 <sup>C</sup> | 1.29E-17 <sup>D</sup> | A: (Toby et al., 1985), B: (Atkinson et al., 1983) C: (Stedman and Niki, 1973), D: (Grosjean and Grosjean, 1996) |
| k[O( <sup>3</sup> P)] | 1.99E-14 <sup>A</sup> | 7.63E-14 <sup>A</sup> | 1.56E-13 <sup>B</sup> |                       | 1.73E-15 <sup>C</sup> | 4.58E-13 <sup>B</sup> | 3.50E-11              | A: (Cvetanović, 1987), B: (Baulch et al., 1994), C: (Herron, 1988), (Paulson et al., 1995)                       |

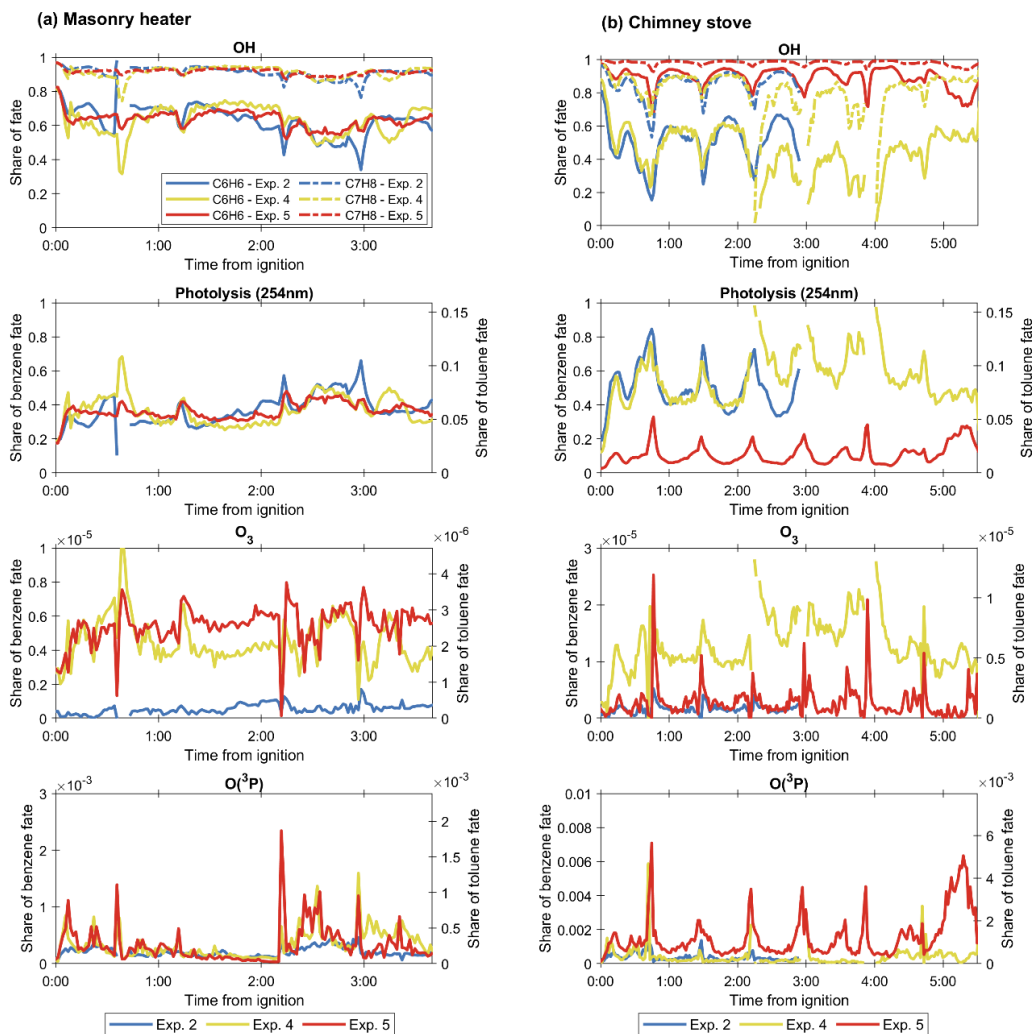

**Figure S10: Share of the considered pathways in the total degradation of benzene and toluene in the PEAR during the experiments.**

S3 Secondary gaseous phase

Table S6: Compounds identified from the RWC exhaust by PTR-ToF-MS and the applied reaction rates with H<sub>3</sub>O<sup>+</sup> (Cappellin et al., 2012).

| Group                             | m/z    | Ion        | Suggested compound                    | k-rate | Group                        | m/z    | Ion         | Suggested compound                          | k-rate |
|-----------------------------------|--------|------------|---------------------------------------|--------|------------------------------|--------|-------------|---------------------------------------------|--------|
| <b>Aliphatic hydrocarbons</b>     |        |            |                                       |        | <b>Carbonyls - primary</b>   |        |             |                                             |        |
|                                   | 53.04  | C4H4-H+    | Butenyne                              | 2.00   |                              | 45.03  | C2H4O-H+    | Acetaldehyde                                | 3.07   |
|                                   | 55.06  | C4H6-H+    | 1,3-Butadiene                         | 1.80   |                              | 55.02  | C3H2O-H+    | 2-propynal                                  | 2.00   |
|                                   | 67.06  | C5H6-H+    | 1,3-cyclopentadiene                   | 1.83   |                              | 57.03  | C3H4O-H+    | Acrolein                                    | 3.49   |
|                                   | 69.07  | C5H8-H+    | Isoprene                              | 1.95   |                              | 71.02  | C3H2O2-H+   | Propiolic acid                              | 2.00   |
|                                   | 97.11  | C7H12-H+   | Cycloheptene                          | 2.00   |                              | 71.05  | C4H6O-H+    | Methyl vinyl ketone, methacrolein           | 3.20   |
|                                   | 109.10 | C8H12-H+   | e.g. Cyclohexene, 4-ethenyl-          | 2.00   |                              | 73.03  | C3H4O2-H+   | 2-Propenoic acid                            | 2.60   |
|                                   | 137.13 | C10H16-H+  | Monoterpenes                          | 2.42   |                              | 75.04  | C3H6O2-H+   | Hydroxy-2-propanone                         | 2.33   |
| <b>Aromatic hydrocarbons</b>      |        |            |                                       |        |                              | 83.01  | C4H2O2-H+   | 3-Cyclobutene-1,2-dione                     | 2.00   |
|                                   | 79.05  | C6H6-H+    | Benzene                               | 1.93   |                              | 85.07  | C5H8O-H+    | e.g. Pentenal                               | 2.00   |
|                                   | 93.07  | C7H8-H+    | Toluene                               | 2.08   |                              | 87.05  | C4H6O2-H+   | e.g. 2,3- butadione                         | 1.70   |
|                                   | 105.07 | C8H8-H+    | Styrene                               | 2.27   |                              | 99.08  | C6H10O-H+   | e.g. Hexenal                                | 3.74   |
|                                   | 107.09 | C8H10-H+   | Xylene, ethylbenzenes                 | 2.26   |                              | 101.06 | C5H8O2-H+   | e.g. Acetylacetone                          | 2.93   |
|                                   | 119.08 | C9H10-H+   | e.g. Indane, methylstyrene            | 2.00   |                              | 103.04 | C4H6O3-H+   | Acetic anhydride                            | 2.00   |
|                                   | 121.10 | C9H12-H+   | C3 benzenes; e.g. Cumene              | 2.40   |                              | 103.08 | C5H10O2-H+  | e.g. Methyl-butanoic acid                   | 2.00   |
|                                   | 129.07 | C10H8-H+   | Naphthalene                           | 2.45   |                              | 117.02 | C4H4O4-H+   | Fumaric acid                                | 2.00   |
|                                   | 143.09 | C11H10-H+  | Methylnaphthalene                     | 2.71   |                              | 117.06 | C5H8O3-H+   | e.g. Acetyloxypropanone                     | 2.00   |
|                                   | 155.08 | C12H10-H+  | e.g. Acenaphthene                     | 2.82   | <b>Carbonyls - secondary</b> |        |             |                                             |        |
|                                   | 167.08 | C13H10-H+  | Fluorene                              | 2.88   |                              | 59.05  | C3H6O-H+    | Acetone, propanal                           | 3.20   |
| <b>Phenolic compounds</b>         |        |            |                                       |        |                              | 61.03  | C2H4O2-H+   | Acetic acid, glycolaldehyde                 | 2.30   |
|                                   | 95.05  | C6H6O2-H+  | Phenol                                | 2.20   |                              | 73.07  | C4H8O-H+    | 2-butanone and 2-methylpropanal             | 3.12   |
|                                   | 109.07 | C7H8O-H+   | Cresols                               | 3.20   |                              | 77.02  | C2H4O3-H+   | Acetic acid, hydroxy-                       | 2.00   |
|                                   | 111.04 | C6H6O2-H+  | Benzenediols                          | 2.00   |                              | 89.03  | C3H4O3-H+   | E.g. Acetic acid anhydride with formic acid | 2.00   |
|                                   | 123.08 | C8H10O-H+  | Dimethylphenol                        | 2.00   |                              | 89.06  | C4H8O2-H+   | Acetoin                                     | 4.23   |
|                                   | 125.06 | C7H8O2-H+  | Guaiacol                              | 2.00   |                              | 99.01  | C4H2O3-H+   | Maleic anhydride                            | 2.00   |
|                                   | 139.04 | C7H6O3-H+  | e.g. Salicylic acid                   | 2.00   |                              | 101.02 | C4H4O3-H+   | Succinic anhydride                          | 2.00   |
|                                   | 139.08 | C8H10O2-H+ | Cresol, Trosol                        | 2.00   |                              | 105.04 | C4H8O3-H+   | e.g. Acetic acid, methoxy-                  | 2.00   |
|                                   | 153.07 | C8H8O3-H+  | e.g. Methoxy-benzoic acid             | 2.00   | <b>Other CHO</b>             |        |             |                                             |        |
| <b>Furanoic compounds</b>         |        |            |                                       |        |                              | 47.05  | C2H6O-H+    | Ethanol                                     | 2.11   |
|                                   | 69.03  | C4H4O-H+   | Furan                                 | 1.70   |                              | 49.03  | CH4O2-H+    | Methyl peroxide or methanediol              | 2.00   |
|                                   | 83.05  | C5H6O-H+   | Methylfurans                          | 2.00   |                              | 63.04  | C2H6O2-H+   | ethanediol                                  | 1.47   |
|                                   | 85.03  | C4H4O2-H+  | Furanone                              | 2.00   |                              | 77.05  | C3H8O2-H+   | e.g. Ethanol 2-methoxy- ; 1,3-Propanediol   | 3.50   |
|                                   | 97.03  | C5H4O2-H+  | Furfural                              | 3.95   |                              | 81.04  | C5H4O-H+    | 2,4-Cyclopentadiene-1-one                   | 2.00   |
|                                   | 97.07  | C6H8O-H+   | Dimethyl- & ethyl furan               | 2.00   |                              | 91.07  | C4H10O2-H+  | Butanediols                                 | 2.00   |
|                                   | 99.04  | C5H6O2-H+  | Furfuryl alcohol                      | 2.00   |                              | 111.08 | C7H10O-H+   | e.g. Heptenediol or trimethylfuran          | 2.00   |
|                                   | 119.05 | C8H6O-H+   | Benzofuran                            | 2.00   |                              | 113.02 | C5H4O3-H+   | e.g. 2-furoic acid                          | 2.00   |
|                                   | 125.02 | C6H4O3-H+  | 2,5-Furandicarboxaldehyde             | 2.00   |                              | 113.06 | C6H8O2-H+   | e.g. Methylcyclohexanone                    | 2.00   |
|                                   | 127.04 | C6H6O3-H+  | 5-Hydroxymethylfurfural               | 2.00   |                              | 115.04 | C5H6O3-H+   | e.g. Hydroxymethylfuranone                  | 2.00   |
| <b>Nitroaromatics</b>             |        |            |                                       |        |                              | 115.08 | C7H10O2-H+  |                                             | 2.00   |
|                                   | 140.03 | C6H5NO3-H+ | Nitrophenols                          | 2.00   |                              | 115.11 | C7H14O-H+   | e.g. Heptanal                               | 2.83   |
|                                   | 154.06 | C7H7NO3-H+ | e.g. Nitrocresol                      | 2.00   |                              | 117.09 | C6H12O2-H+  |                                             | 2.00   |
| <b>Other oxygenated aromatics</b> |        |            |                                       |        |                              | 127.08 | C7H10O2-H+  |                                             | 2.00   |
|                                   | 107.05 | C7H6O-H+   | Benzaldehyde                          | 3.73   |                              | 139.11 | C9H14O-H+   |                                             | 2.00   |
|                                   | 109.03 | C6H4O2-H+  | Benzoquinones                         | 1.99   |                              | 145.05 | C6H8O4-H+   | e.g. Dimethyl fumarate                      | 2.00   |
|                                   | 121.07 | C8H8O-H+   | E.g. Acetophenone                     | 3.36   |                              | 157.08 | C8H12O3-H+  |                                             | 2.00   |
|                                   | 123.04 | C7H6O2-H+  | Benzoic acid                          | 2.68   | <b>CHNO</b>                  |        |             |                                             |        |
|                                   | 133.06 | C9H8O-H+   | e.g. Cinnamic acid                    | 2.00   |                              | 44.01  | CHNO-H+     | Isocyanic acid                              | 2.00   |
|                                   | 135.04 | C8H6O2-H+  | e.g. Isophthalaldehyde, phenylglyoxal | 2.00   |                              | 58.03  | C2H3NO-H+   | Methyl isocyanate                           | 2.00   |
|                                   | 135.08 | C9H10O-H+  | e.g. 4-Ethylbenzaldehyde              | 2.00   |                              | 60.05  | C2H5NO-H+   | e.g. Acetamide                              | 2.00   |
|                                   | 137.06 | C8H8O2-H+  | e.g. Benzeneacetic acid               | 2.00   |                              | 62.03  | CH3NO2-H+   | e.g. Nitromethane, methyl nitrite           | 2.00   |
|                                   | 141.05 | C7H8O3-H+  |                                       | 2.00   |                              | 70.03  | C3H3NO-H+   | e.g. Vinyl isocyanate                       | 2.00   |
|                                   | 147.06 | C9H6O2-H+  | e.g. Coumarin                         | 2.00   |                              | 74.03  | C2H3NO2-H+  | e.g. Nitroethylene                          | 2.00   |
|                                   | 149.02 | C8H4O3-H+  | Phthalic anhydride                    | 2.00   |                              | 74.06  | C3H7NO-H+   | Propanamide                                 | 2.00   |
|                                   | 151.04 | C8H6O3-H+  | e.g. Benzoylformic acid               | 2.00   |                              | 84.05  | C4H5NO-H+   |                                             | 2.00   |
|                                   | 151.08 | C9H10O2-H+ | e.g. Hydrocinnamic acid               | 2.00   |                              | 86.03  | C3H3NO2-H+  | Acetic acid, cyano-                         | 2.00   |
|                                   | 151.11 | C10H14O-H+ | e.g. Verbenone                        | 2.00   |                              | 86.07  | C4H7NO-H+   | e.g. Methacrylamide                         | 2.00   |
|                                   | 159.04 | C10H6O2-H+ | Naphthalenedione                      | 2.00   |                              | 88.05  | C3H5NO2-H+  | Nitropropene                                | 2.00   |
|                                   | 163.04 | C9H6O3-H+  |                                       | 2.00   |                              | 88.08  | C4H9NO-H+   |                                             | 2.00   |
|                                   | 169.07 | C12H8O-H+  | e.g. dibenzofuran                     | 2.00   |                              | 96.06  | C5H5NO-H+   | Pyridine-N-oxide                            | 2.00   |
| <b>CHN</b>                        |        |            |                                       |        |                              | 100.04 | C4H5NO2-H+  |                                             | 2.00   |
|                                   | 42.04  | C2H3N-H+   | Acetonitrile                          | 3.90   |                              | 112.05 | C5H5NO2-H+  |                                             | 2.00   |
|                                   | 54.04  | C3H3N-H+   | Propenenitrile                        | 2.00   |                              | 114.02 | C4H3NO3-H+  | Nitrofuran                                  | 2.00   |
|                                   | 56.05  | C3H5N-H+   | e.g. Propanenitrile                   | 2.00   |                              | 114.06 | C5H7NO2-H+  | e.g. Ethyl cyanoacetate                     | 2.00   |
|                                   | 68.05  | C4H5N-H+   | e.g. Pyrrole                          | 2.38   |                              | 120.05 | C7H5NO-H+   | e.g. Benzisoxazole                          | 2.00   |
|                                   | 70.07  | C4H7N-H+   | e.g. Butanenitrile                    | 2.00   |                              | 122.02 | C2H3NO5 -H+ | peroxyacetyl nitrate                        | 2.00   |
|                                   | 84.09  | C5H9N-H+   | e.g. Pentanenitrile                   | 2.00   |                              | 122.07 | C7H7NO-H+   | e.g. Benzamide                              | 2.00   |
|                                   | 100.08 | C5H9N3-H+  |                                       | 2.00   |                              | 124.05 | C6H5NO2-H+  | Nitrobenzene                                | 2.00   |
|                                   | 104.05 | C7H5N-H+   | Benzonitrile                          | 2.00   |                              | 136.04 | C7H5NO2-H+  | e.g. 2-Furoylacetonitrile                   | 2.00   |
|                                   | 118.06 | C8H7N-H+   | Indole                                | 2.00   |                              |        |             |                                             |        |



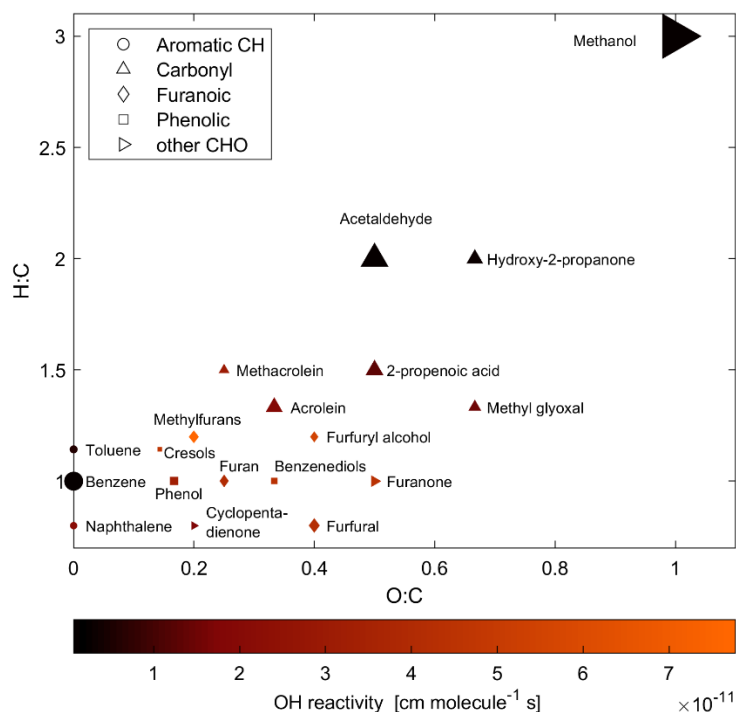

Figure S11: Van Krevelen diagram of selected VOCs commonly emitted from RWC. The marker size is scaled based on concentration in the fresh exhaust from spruce combustion in a modern masonry heater (Hartikainen et al., 2018), whereas the marker color indicates the compounds reactivity with OH.

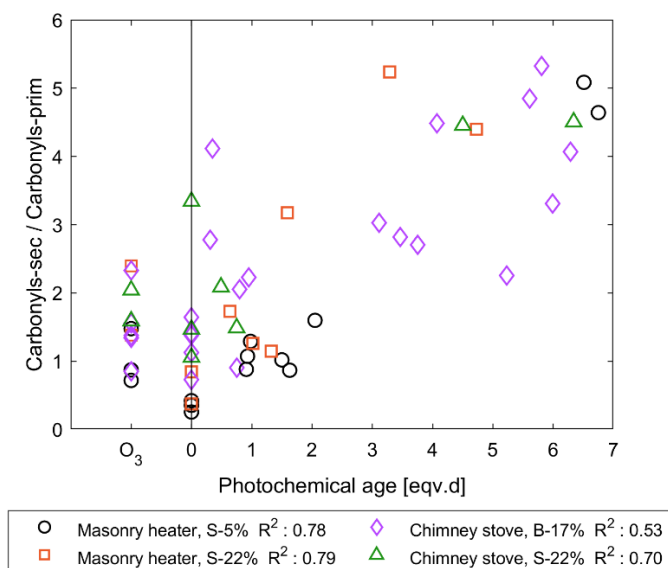

Figure S12: The ratios between the concentrations of the two carbonyl groups (secondary:primary) as the function of photochemical age.

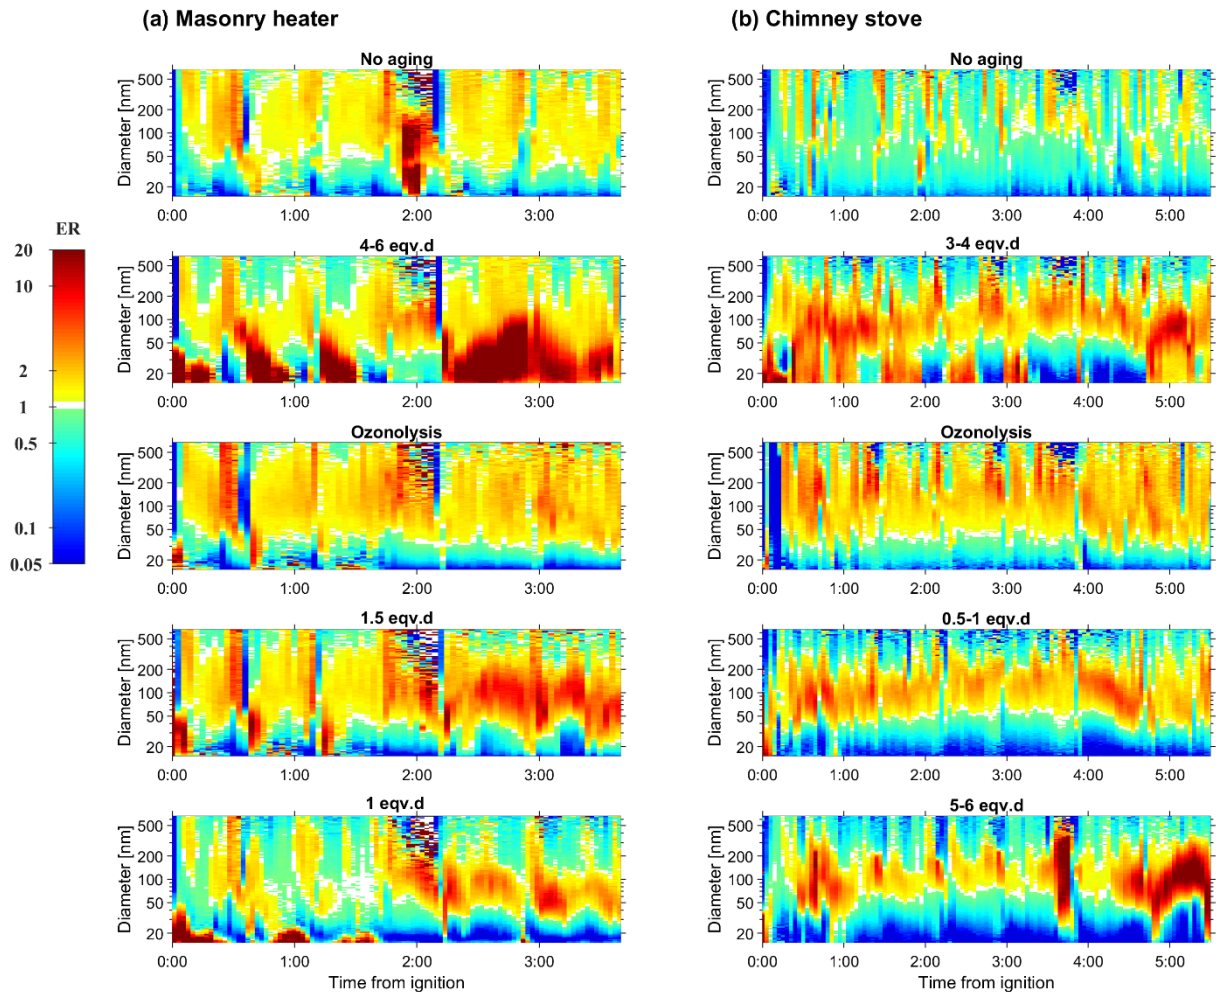

**Figure S13: Particle number enhancement ratios (ER; secondary/primary) based on the SMPS measurements before and after PEAR.**

**S5 Aerosol mass spectrometry analyses**

115 The measurements of the non-refractory chemical species (Org, NO<sub>3</sub>, SO<sub>4</sub>, NH<sub>4</sub> and Chl) were conducted with the standard tungsten vaporizer, while the SP-AMS dual vaporizer mode was used to characterise the refractory black carbon (rBC) (Onasch et al., 2012). Standard mass-based calibrations were performed for the ionisation efficiency in the AMS using ammonium nitrate and Regal Black (Regal 400R Pigment Black, Cabot Corp.) particles (Jayne et al., 2000; Onasch et al., 2012). SP-AMS

was operated in V-mode from 12 to 555 m/z and the two vaporizer configurations were alternated every 120 s, including the particle time-of-flight (PTOF) mode (duration 20 s). AMS data analysis was performed using the standard analysis tools SQUIRREL v1.62A and PIKA v1.22A adapted in Igor Pro 8 (Wavemetrics). The data was corrected for time-dependent background gas-phase CO<sub>2</sub> and for the interactions of inorganic salts with pre-deposited carbon on the tungsten vaporizer (Pieber et al., 2016) using a relative ionisation efficiency (RIE) of 1.4.

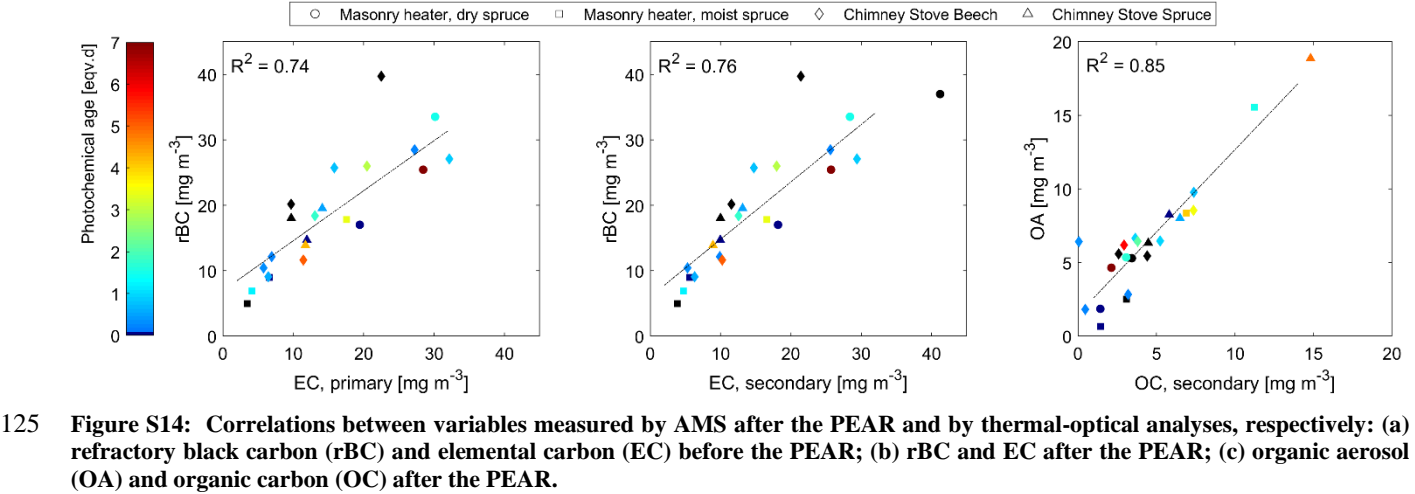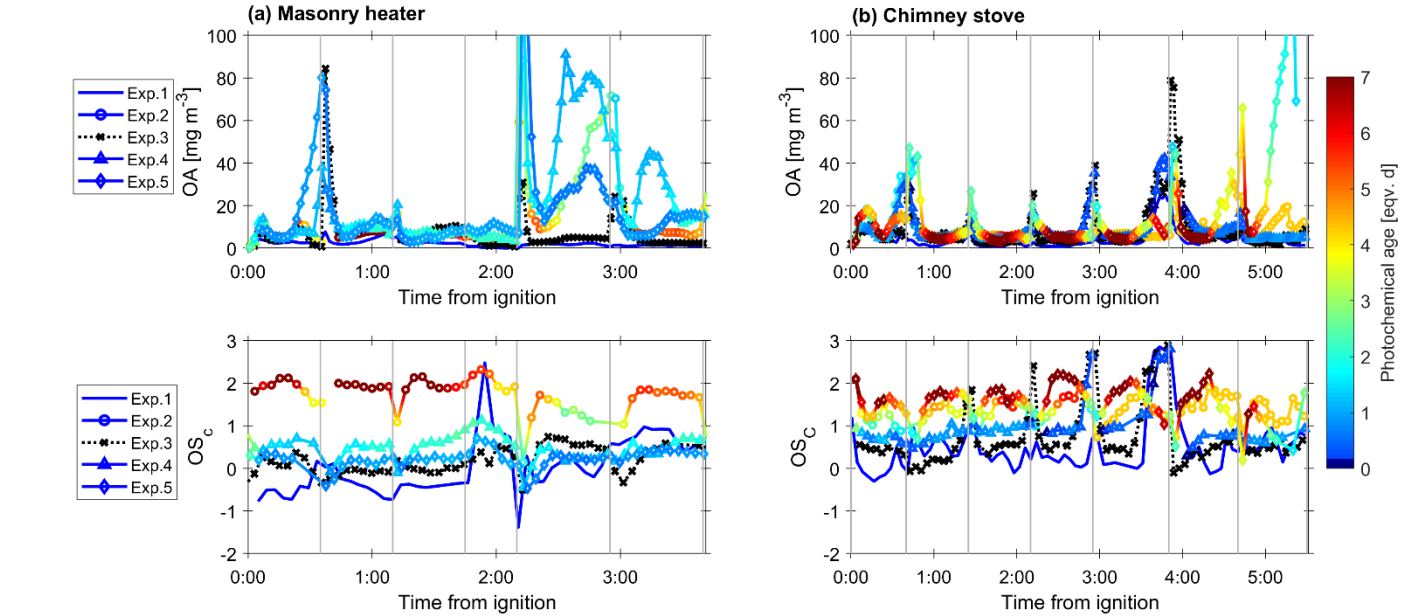

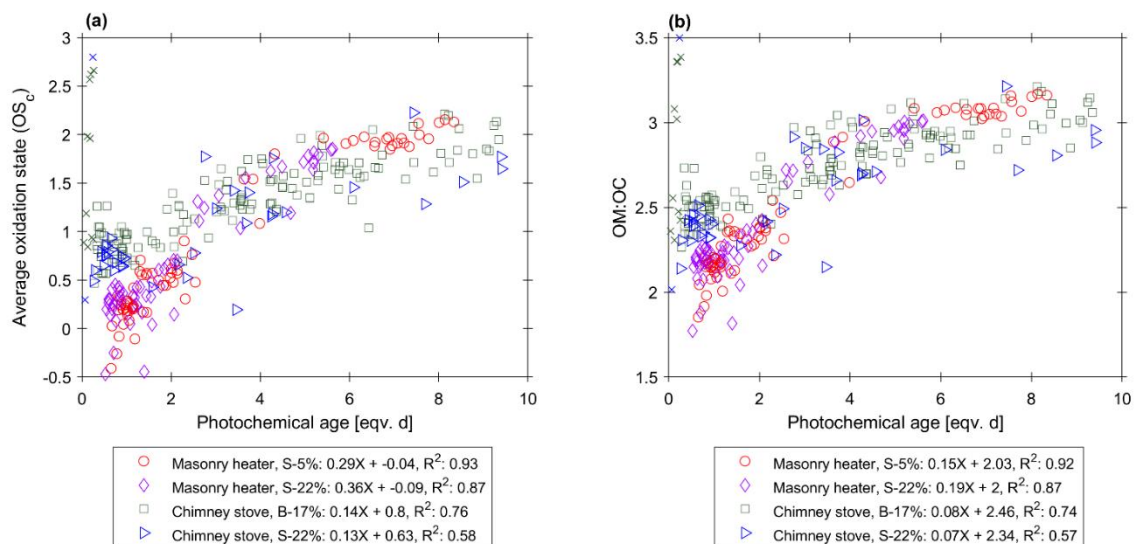

**Figure 16: Relationship between photochemical age and (a) oxidation state and (b) OM:OC ratio during the photochemical aging experiments. Coefficients of determination ( $R^2$ ) were calculated for the photochemical exposure range of 0.25-10 eqv.d. Values outside this age range (crossed over) were not considered.**

**Table S7: Average chemical composition of the OA (dilution corrected, dry, 13 % O<sub>2</sub>) measured by AMS.**

|                | Exp. | Fuel  | Exposure<br>[eqv.d] | O:C  | H:C  | OS <sub>C</sub> | OM:OC | rBC<br>mg m <sup>-3</sup> | OA<br>mg m <sup>-3</sup> | PAH<br>μg m <sup>-3</sup> | NO <sub>3</sub><br>mg m <sup>-3</sup> | SO <sub>4</sub><br>mg m <sup>-3</sup> | NH <sub>4</sub><br>mg m <sup>-3</sup> | Chl<br>mg m <sup>-3</sup> |
|----------------|------|-------|---------------------|------|------|-----------------|-------|---------------------------|--------------------------|---------------------------|---------------------------------------|---------------------------------------|---------------------------------------|---------------------------|
| Masonry heater | 1    | S-5%  |                     | 0.55 | 1.51 | -0.18           | 1.86  | 28.89                     | 3.10                     | 98                        | 0.16                                  | 0.17                                  | 0.00                                  | 0.17                      |
|                |      | S-22% |                     | 0.82 | 1.33 | 0.15            | 2.20  | 21.77                     | 1.57                     | 27                        | 0.11                                  | 0.13                                  | 0.00                                  | 0.12                      |
|                | 2    | S-5%  | 6.72                | 1.45 | 1.06 | 0.92            | 3.02  | 42.83                     | 7.63                     | 16                        | 1.92                                  | 0.80                                  | 0.79                                  | 0.02                      |
|                |      | S-22% | 4.02                | 1.30 | 1.12 | 0.64            | 2.83  | 48.03                     | 24.98                    | 80                        | 1.50                                  | 1.08                                  | 0.96                                  | 0.03                      |
|                | 3    | S-5%  | O <sub>3</sub>      | 0.69 | 1.38 | 0.00            | 2.03  | 68.54                     | 9.64                     | 246                       | 1.42                                  | 0.21                                  | 0.03                                  | 0.13                      |
|                |      | S-22% | O <sub>3</sub>      | 0.81 | 1.28 | 0.15            | 2.19  | 12.15                     | 6.61                     | 180                       | 0.84                                  | 0.25                                  | 0.03                                  | 0.06                      |
|                | 4    | S-5%  | 0.94                | 0.90 | 1.31 | 0.22            | 2.31  | 59.40                     | 9.58                     | 105                       | 1.27                                  | 0.44                                  | 0.16                                  | 0.04                      |
|                |      | S-22% | 0.73                | 0.84 | 1.33 | 0.17            | 2.23  | 17.70                     | 44.11                    | 485                       | 1.00                                  | 0.38                                  | 0.49                                  | 0.04                      |
|                | 5    | S-5%  | 1.71                | 0.76 | 1.36 | 0.07            | 2.13  | 47.08                     | 13.69                    | 241                       | 1.36                                  | 0.27                                  | 0.16                                  | 0.05                      |
|                |      | S-22% | 1.46                | 0.78 | 1.34 | 0.11            | 2.16  | 24.47                     | 24.54                    | 455                       | 1.20                                  | 0.37                                  | 0.24                                  | 0.03                      |
| Chimney stove  | 1    | B-17% |                     | 0.86 | 1.25 | 0.22            | 2.26  | 23.03                     | 3.86                     | 65                        | 0.34                                  | 1.08                                  | 0.00                                  | 0.28                      |
|                |      | S-22% |                     | 1.47 | 0.91 | 0.41            | 2.32  | 27.97                     | 4.02                     | 80                        | 0.21                                  | 1.13                                  | 0.00                                  | 0.31                      |
|                | 2    | B-17% | 3.61                | 1.25 | 1.14 | 0.63            | 2.76  | 21.60                     | 8.78                     | 23                        | 5.07                                  | 1.66                                  | 1.38                                  | 0.02                      |
|                |      | S-22% | ~4                  | 1.47 | 1.19 | 0.90            | 2.80  | 19.70                     | 10.39                    | 26                        | 4.05                                  | 1.33                                  | 0.96                                  | 0.02                      |
|                | 3    | B-17% | O <sub>3</sub>      | 1.01 | 1.15 | 0.41            | 2.44  | 26.24                     | 8.33                     | 114                       | 3.32                                  | 1.82                                  | 0.22                                  | 0.12                      |
|                |      | S-22% | O <sub>3</sub>      | 0.82 | 1.30 | 0.16            | 2.20  | 24.89                     | 10.34                    | 271                       | 2.41                                  | 1.12                                  | 0.16                                  | 0.13                      |
|                | 4    | B-17% | 0.62                | 1.09 | 1.17 | 0.47            | 2.55  | 20.93                     | 9.95                     | 52                        | 10.90                                 | 2.93                                  | 1.88                                  | 0.08                      |
|                |      | S-22% | 0.70                | 1.04 | 1.23 | 0.05            | 2.37  | 27.91                     | 11.46                    | 215                       | 6.40                                  | 1.89                                  | 1.02                                  | 0.08                      |
|                | 5    | B-17% | 5.78                | 1.36 | 1.11 | 0.80            | 2.91  | 21.81                     | 9.45                     | 22                        | 7.34                                  | 2.68                                  | 1.66                                  | 0.02                      |
|                |      | S-22% | 5.83                | 0.87 | 1.32 | 0.10            | 2.74  | 19.63                     | 32.71                    | 158                       | 4.63                                  | 1.26                                  | 1.31                                  | 0.03                      |

S5.1 Positive matrix factorisation analysis

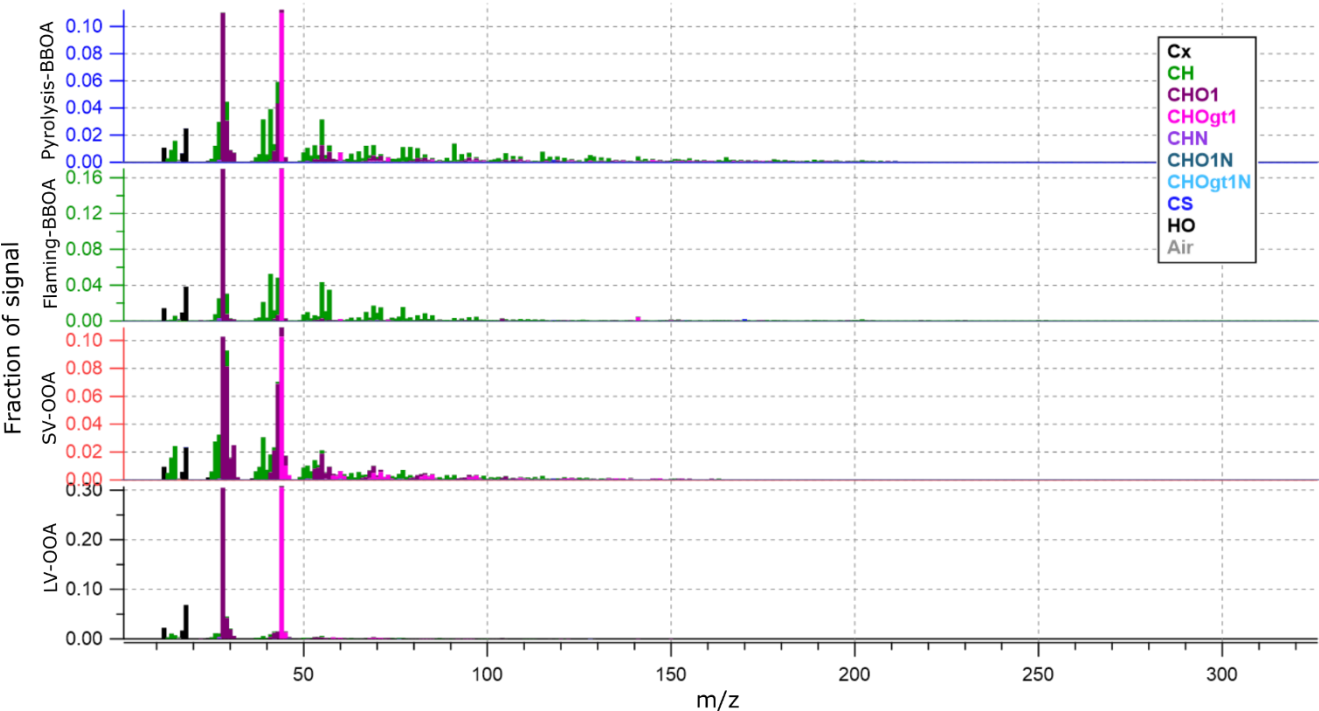

Figure S17: Spectra of the four factors identified from the AMS OA spectra by positive matrix factorisation analysis.

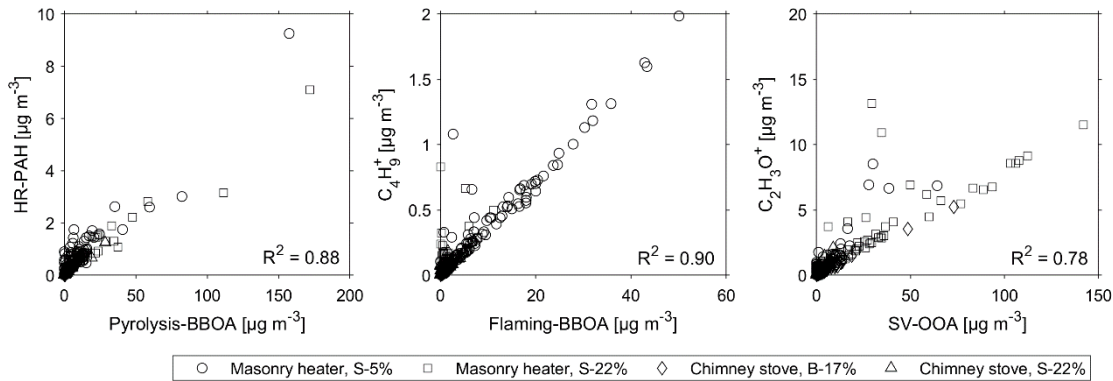

Figure S18: Correlations between (a) pyrolysis-BBOA and PAC concentration, (b) flaming-BBOA and  $C_4H_9^+$ , and (c) SV-OOA to  $C_2H_3O^+$ .

S5.2 HR-PAH analysis

Table S8: Ions included in the HR-PAH analysis, based on the grouping by Herring et al. (2015). Analysis was adapted for RWC exhaust with an addition of polycyclic aromatic compounds typically released from RWC (Avagyan et al., 2016; Bertrand et al., 2018; Bruns et al., 2015; Czech et al., 2018; Miersch et al., 2019).

| Unsubstituted PAHs | Oxygenated PAHs | Methylated PAHs | Nitrogen-substituted PAHs | Amino PAHs |
|--------------------|-----------------|-----------------|---------------------------|------------|
| (UnSubPAH)         | (OPAH)          | (MPAH)          | (NPAH)                    | (APAH)     |
| C10H8              | C9H8O           | C11H10          | C10H7NO2                  | C16H11N    |
| C12H8              | C11H8O          | C12H12          | C12H9NO2                  | C18H13NO   |
| C12H10             | C11H8O2*        | C13H12          | C13H9NO2                  | C20H13N    |
| C13H10             | C10H6O2         | C14H12          | C14H9NO2                  | C21H13N    |
| C14H8              | C12H8O          | C15H12          | C16H9NO2                  |            |
| C14H10             | C13H8O          | C15H14          | C13H8N2O4                 |            |
| C15H10             | C13H10O         | C16H14          | C18H11NO2                 |            |
| C16H10             | C12H6O3*        | C17H16          |                           |            |
| C17H12             | C12H6O2         | C18H14*         |                           |            |
| C18H10             | C12H8O2         | C18H18          |                           |            |
| C18H12             | C12H8O3*        | C19H14          |                           |            |
| C20H10             | C14H10O         | C20H16          |                           |            |
| C20H12             | C13H8O2         | C21H16          |                           |            |
| C22H12             | C15H8O          |                 |                           |            |
| C22H14             | C14H8O2         |                 |                           |            |
| C24H12*            | C15H8O2*        |                 |                           |            |
|                    | C16H8O2         |                 |                           |            |
|                    | C16H10O*        |                 |                           |            |
|                    | C17H10O*        |                 |                           |            |
|                    | C19H10O         |                 |                           |            |
|                    | C18H10O2        |                 |                           |            |

\* added for RWC

150 S6 In-situ derivatisation and thermal desorption - gas-chromatography - time-of-flight mass spectrometry

In-situ derivatisation and thermal desorption - gas-chromatography - time-of-flight mass spectrometry (IDTD-GC-ToFMS, (Orasche et al. 2011) was utilised in analysis of semi volatile organic target analytes in particulate phase. Subsamples were taken from the collected quartz fibre filters and prepared in GC-liners for the analyses. 10 µl Methyl-trimethylsilyl-trifluoroacetamid (MSTFA, Macherey-Nagel, Germany) was added automatically in each liner by the sampling robot (PAL Focus, Atlas GL, Netherlands) before samples were placed into a direct thermal desorption unit (Linex and Optic 3, Atlas GL,

155

Netherlands). Furthermore, the samples were spiked with mixtures of isotope labelled internal standards and calibration standards for the purpose of calibration and quantification of the non-polar (Table S9) and polar (Table S10) compounds.

MSTFA was continuously added to the helium carrier gas on a 4 ml min<sup>-1</sup> stream, throughout the 16 minutes of thermal extraction at 300 °C. After the thermal extraction and derivatisation procedure, the pure helium flow was set back to 0.7 ml min<sup>-1</sup>, with a split flow of 50 ml min<sup>-1</sup>. IDTD was done at an isothermal GC temperature of 50° C in order to trap desorbed compounds at the front of the separation column before starting the GC-MS run. The column in use was an almost non-polar BPX5, 25 m, 0.22 mm ID, 0.25 µm film thicknesses (SGE, Australia), used in an Agilent 6890 gas chromatograph (Agilent, USA). Mass spectrometric detection in the range 35 to 500 m/z was carried out on a Pegasus III ToFMS (LECO, USA) using an acquisition frequency of 25 spectra per second. Evaluation of mass spectra was done with the ChromaTOF software package (LECO, USA).

**Table S9: Isotope labelled internal standards for nonpolar compounds used in the IDTD-GC-ToFMS analyses.**

| Isotope labelled internal standard mixture | Calibration standard mixture    |                                 |
|--------------------------------------------|---------------------------------|---------------------------------|
| 9,10-Anthracenedione 13C6                  | 1(2H)-Acenaphthylene            | Benz[a]pyrene                   |
| Acenaphthene d10                           | 1,2,4-Trimethylantracene        | Benz[e]pyrene                   |
| Acenaphthylene d8                          | 1,2-Dimethylnaphthalene         | Benzo[a]anthracene-7,12-dione   |
| Anthracene d10                             | 1,3,6,8-Tetramethylpyrene       | Benzo[b]fluoranthene            |
| Benz[a]anthracene d12                      | 1,3,7-Trimethylnaphthalene      | Benzo[b]fluoranthene            |
| Benz[a]pyrene d12                          | 1,4-Naphthoquinone              | Benzo[b]naphtho[1,2-d]thiophene |
| Benz[e]pyrene d12                          | 1,8-Naphthalic anhydride        | Benzo[b]naphtho[2,1-d]furan     |
| Benzo[a]anthracene-7,12-dione d10          | 11H-Benzo[a]fluoren-11-one      | Benzo[b]naphtho[2,1-d]thiophene |
| Benzo[b]fluoranthene d12                   | 11H-Benzo[b]fluoren-11-one      | Benzo[b]naphtho[2,3-d]furan     |
| Benzo[b]fluoranthene d12                   | 1-Ethylpyrene                   | Benzo[c]phenanthrene            |
| Benzo[ghi]perylene d12                     | 1-Methyl-benz[a]anthracene      | Benzo[ghi]perylene              |
| Benzo[k]fluoranthene d12                   | 1-Methylfluorene                | Benzo[k]fluoranthene            |
| Benzo[k]fluoranthene d12                   | 1-Methylpyrene                  | Benzo[k]fluoranthene            |
| Biphenyl d10                               | 1-Naphthaldehyde                | Biphenyl                        |
| Chrysene d12                               | 2,2'-Binaphthalene              | Chrysene                        |
| Coronene d12                               | 2,3,6,7-Tetramethylantracene    | Coronene                        |
| Dibenz[ah]anthracene d14                   | 2,6-Dimethoxybenzoquinone       | Cyclopenta(def)phenanthrenone   |
| Dibenzothiophene d8                        | 2-Phenylnaphthalene             | Dibenz[ac]anthracene            |
| Docosane d46                               | 3,6-Dimethylphenanthrene        | Dibenz[ah]anthracene            |
| Eicosane d42                               | 3-Methylfluorene                | Dibenzothiophene                |
| Fluoranthene d10                           | 4,5-Dimethylpyrene              | Fluoranthene                    |
| Fluorene d10                               | 5,12-Naphthacenedione           | Fluorene                        |
| Hexadecane d34                             | 6-Ethylchrysene                 | Indeno[1,2,3-cd]pyrene          |
| Indeno[1,2,3-cd]pyrene d12                 | 7,12-Dimethyl-Benz[a]anthracene | Methyleicosanoate               |
| Naphthalene d8                             | 9,10-Anthracenedione            | n-Alkanes C12-C40               |
| Octadecane d38                             | 9,10-Dimethylphenanthrene       | Naphthalene                     |
| Perylene d12                               | 9H-Fluoren-9-one                | Naphtho[2,1,8,7-klmn]xanthene   |
| Phenanthrene d10                           | 9-Methylphenanthrene            | Perylene                        |
| Pyrene d10                                 | Acenaphthene                    | Phenanthrene                    |
| Tetracosane d50                            | Acenaphthonquinone              | Picene                          |
| Triacotane d62                             | Acenaphthylene                  | Pyrene                          |
|                                            | Anthracene                      | Retene                          |
|                                            | Benz[a]anthracene               | Xanthone                        |



Table S10: Isotope labelled internal standards used for polar compounds in the IDTD-GC-ToFMS analyses.

| Isotope labelled internal standard mixture | Calibration standard mixture |                  |
|--------------------------------------------|------------------------------|------------------|
| 4-Nitrophenol d4                           | 1-Hydroxypyrene              | Glutaric acid    |
| Adipic acid d10                            | 2-Hydroxy-1-naphthaldehyde   | Hexanedioic acid |
| Cholesterol d6                             | 2-Ketoglutaric acid          | Hexanoic acid    |
| Dodecanol d25                              | 2-Methyl-4-Nitrophenol       | Isopimaric acid  |
| Fumaric acid d2                            | 2-Methylerythritol           | Levogluconan     |
| Glucose 13C6                               | 2-Naphthanol                 | Linoleic acid    |
| Glycerol d8                                | 3-Hydroglutaric acid         | Maleic acid      |
| Levogluconan 13C6                          | 3-Hydroxyphenanthrene        | Malic acid       |
| Palmitic acid d31                          | 4-Hydroxyphenanthrene        | Malonic acid     |
| Vanillin 13C6                              | 4-Nitrocatechol              | Mannosan         |
|                                            | 4-Nitrophenol                | Methyl vanillate |
|                                            | 9-Hydroxyphenanthrene        | Oleic acid       |
|                                            | Abietic acid                 | Palmitic acid    |
|                                            | Acetosyringone               | Phthalic acid    |
|                                            | Adipic Acid                  | Salicylic acid   |
|                                            | Azelaic acid                 | Sorbit           |
|                                            | Butanedioic acid             | Stearic acid     |
|                                            | Cholesterol                  | Syringic Acid    |
|                                            | Coniferaldehyde              | Tartaric acid    |
|                                            | Ergosterol                   | Threitol         |
|                                            | Erythritol                   | Trimellitic acid |
|                                            | Fumaric acid                 | Vanillic acid    |
|                                            | Galactosan                   | Vanillin         |

170

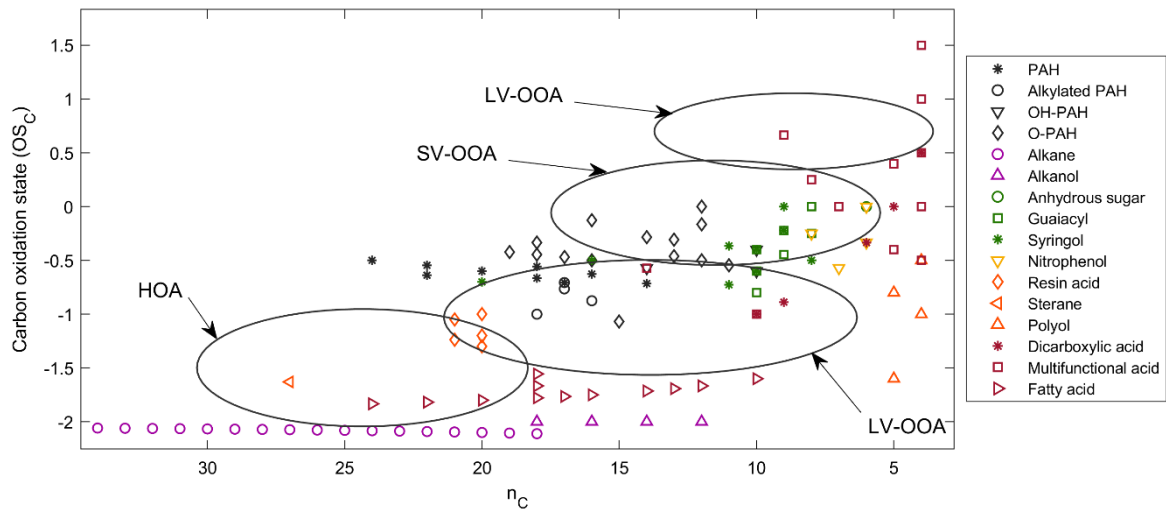

Figure S19: Compounds analysed by IDTD-GC-ToFMS displayed in the  $OS_C$ - $n_C$  space. The ambient organic aerosol classes identified by Kroll et al. (2011) are presented as an approximate reference for average hydrocarbon-like OA (HOA), primary biomass burning OA (BBOA), semi-volatile oxidised OA (SV-OOA) and low-volatility oxidised OA (LV-OOA).

175

Table S11: Pearson correlation coefficients between the particulate organic aerosol constituents measured by AMS (PMF and HR-PAH) and IDTD-GC-TOF-MS.

|                    |                                  | PMF factors        |                  |             |             | HR-PAH      |               |             |             |             |             |
|--------------------|----------------------------------|--------------------|------------------|-------------|-------------|-------------|---------------|-------------|-------------|-------------|-------------|
|                    |                                  | Pyrolysis<br>-BBOA | Flaming-<br>BBOA | SV-<br>OOA  | LV-<br>OOA  | Total       | Unsub-<br>PAH | OPAH        | MPAH        | NPAH        | APAH        |
| PMF<br>factors     | Pyrolysis-BBOA                   | 1.00               | 0.17             | 0.40        | -0.02       | <b>0.96</b> | <b>0.96</b>   | <b>0.87</b> | <b>0.97</b> | <b>0.86</b> | <b>0.89</b> |
|                    | Flaming-BBOA                     | 0.17               | 1.00             | -0.07       | -0.21       | 0.19        | 0.21          | 0.17        | 0.14        | 0.17        | 0.21        |
|                    | SV-OOA                           | 0.40               | -0.07            | 1.00        | 0.35        | 0.48        | 0.44          | <b>0.70</b> | 0.38        | <b>0.68</b> | 0.57        |
|                    | LV-OOA                           | -0.02              | -0.21            | 0.35        | 1.00        | -0.02       | -0.04         | 0.09        | -0.04       | 0.06        | 0.03        |
| HR-PAH             | Total                            | <b>0.96</b>        | 0.19             | 0.48        | -0.02       | 1.00        | <b>1.00</b>   | <b>0.94</b> | <b>0.99</b> | <b>0.94</b> | <b>0.96</b> |
|                    | UnsubPAH                         | <b>0.96</b>        | 0.21             | 0.44        | -0.04       | <b>1.00</b> | 1.00          | <b>0.93</b> | <b>0.99</b> | <b>0.93</b> | <b>0.95</b> |
|                    | OPAH                             | <b>0.87</b>        | 0.17             | <b>0.70</b> | 0.09        | <b>0.94</b> | <b>0.93</b>   | 1.00        | <b>0.88</b> | <b>0.98</b> | <b>0.94</b> |
|                    | MPAH                             | <b>0.97</b>        | 0.14             | 0.38        | -0.04       | <b>0.99</b> | <b>0.99</b>   | <b>0.88</b> | 1.00        | <b>0.88</b> | <b>0.92</b> |
|                    | NPAH                             | <b>0.86</b>        | 0.17             | <b>0.68</b> | 0.06        | <b>0.94</b> | <b>0.93</b>   | <b>0.98</b> | <b>0.88</b> | 1.00        | <b>0.97</b> |
|                    | APAH                             | <b>0.89</b>        | 0.21             | 0.57        | 0.03        | <b>0.96</b> | <b>0.95</b>   | <b>0.94</b> | <b>0.92</b> | <b>0.97</b> | 1.00        |
| IDTD-GC-<br>ToF-MS | PAH                              | 0.01               | <b>0.64</b>      | -0.22       | -0.17       | 0.19        | 0.27          | 0.04        | 0.15        | 0.09        | 0.09        |
|                    | OH-PAHs                          | 0.31               | -0.05            | <b>0.88</b> | <b>0.65</b> | <b>0.75</b> | <b>0.65</b>   | <b>0.92</b> | 0.54        | <b>0.88</b> | <b>0.87</b> |
|                    | Carbonyl-PAHs                    | 0.50               | -0.12            | 0.49        | 0.35        | <b>0.69</b> | <b>0.67</b>   | <b>0.74</b> | 0.52        | <b>0.65</b> | <b>0.58</b> |
|                    | alkylated PAHs                   | 0.01               | <b>0.75</b>      | -0.16       | -0.26       | 0.21        | 0.29          | 0.01        | 0.24        | 0.09        | 0.14        |
|                    | alkanes                          | -0.10              | 0.31             | -0.19       | -0.38       | -0.17       | -0.12         | -0.25       | -0.10       | -0.22       | -0.17       |
|                    | alkanols                         | -0.11              | 0.26             | 0.43        | <b>0.70</b> | 0.22        | 0.17          | 0.36        | 0.06        | 0.35        | 0.38        |
|                    | anhydrous sugars                 | 0.53               | -0.24            | <b>0.70</b> | 0.35        | <b>0.68</b> | <b>0.61</b>   | <b>0.71</b> | <b>0.65</b> | <b>0.78</b> | <b>0.76</b> |
|                    | guaiaacyls                       | 0.10               | 0.26             | 0.10        | -0.09       | 0.29        | 0.30          | 0.21        | 0.26        | 0.28        | 0.28        |
|                    | nitro phenols                    | -0.17              | -0.14            | <b>0.60</b> | <b>0.76</b> | 0.09        | -0.03         | 0.37        | -0.08       | 0.32        | 0.31        |
|                    | resin acids                      | <b>0.63</b>        | 0.23             | -0.24       | -0.42       | 0.45        | 0.54          | 0.09        | <b>0.66</b> | 0.25        | 0.24        |
|                    | polyols                          | 0.27               | -0.09            | <b>0.93</b> | <b>0.63</b> | <b>0.71</b> | <b>0.61</b>   | <b>0.89</b> | 0.51        | <b>0.87</b> | <b>0.87</b> |
|                    | dicarboxylic acids               | 0.12               | -0.01            | <b>0.87</b> | <b>0.74</b> | <b>0.63</b> | 0.53          | <b>0.83</b> | 0.40        | <b>0.80</b> | <b>0.81</b> |
|                    | multifunctional acids/ anhydrids | -0.10              | -0.16            | <b>0.93</b> | <b>0.89</b> | 0.40        | 0.26          | <b>0.71</b> | 0.15        | <b>0.66</b> | <b>0.67</b> |
|                    | fatty acids                      | -0.05              | 0.50             | -0.40       | -0.34       | -0.08       | 0.01          | -0.26       | -0.01       | -0.21       | -0.15       |

Table S12: Secondary concentrations (ng m<sup>-3</sup>) of compounds measured by IDTD-GC-ToFMS. Normalised to dry, 13 % O<sub>2</sub> flue gas conditions. Attached as a .xlsx file.

180

## References

- Atkinson, R., Baulch, D. L., Cox, R. A., Crowley, J. N., Hampson Jr, R. F., Kerr, J. A., Rossi, M. J. and Troe, J.: Summary of evaluated kinetic and photochemical data for atmospheric chemistry, IUPAC Subcommittee on gas kinetic data evaluation for atmospheric chemistry, 20, 2001.
- 185 Atkinson, R.: Kinetics and mechanisms of the gas-phase reactions of the hydroxyl radical with organic compounds under atmospheric conditions, *Chem. Rev.*, 86, 69-201, 1986.
- Atkinson, R., Aschmann, S. M. and Carter, W. P.: Kinetics of the reactions of O<sub>3</sub> and OH radicals with furan and thiophene at 298±2 K, *Int J Chem Kinet*, 15, 51-61, 1983.
- Avagyan, R., Nyström, R., Lindgren, R., Boman, C. and Westerholm, R.: Particulate hydroxy-PAH emissions from a  
190 residential wood log stove using different fuels and burning conditions, *Atmos. Environ.*, 140, 1-9, 2016.
- Barmet, P., Dommen, J., DeCarlo, P. F., Tritscher, T., Praplan, A. P., Platt, S. M., Prvt, A., Donahue, N. M. and Baltensperger, U.: OH clock determination by proton transfer reaction mass spectrometry at an environmental chamber, *Atmos. Meas. Tech.*, 5, 647, 2012.
- Baulch, D. L., Cobos, C. J., Cox, R. A., Frank, P., Hayman, G., Just, T., Kerr, J. A., Murrells, T., Pilling, M. J., Troe, J.,  
195 Walker, W. and Warnatz, J.: Evaluated kinetic data for combustion modeling. Supplement I, *J. Phys. Chem. Ref. Data*, 23, 847-848, 1994.
- Baulch, D. L., Cobos, C., Cox, R. A., Esser, C., Frank, P., Just, T., Kerr, J. A., Pilling, M. J., Troe, J. and Walker, R. W., and Warnatz, J.: Evaluated kinetic data for combustion modelling, *J. Phys. Chem. Ref. Data*, 21, 411-734, 1992.
- Bertrand, A., Stefenelli, G., Jen, C. N., Pieber, S. M., Bruns, E. A., Ni, H., Temime-Roussel, B., Slowik, J. G., Goldstein, A.  
200 H., El Haddad, I., Baltensperger, U., Prévôt, A. S. H., Wortham, H. and Marchand, N.: Evolution of the chemical fingerprint of biomass burning organic aerosol during aging, *Atmos. Chem. Phys.*, 18, 7607-7624, 2018.
- Bruns, E. A., Krapf, M., Orasche, J., Huang, Y., Zimmermann, R., Drinovec, L., Močnik, G., El-Haddad, I., Slowik, J. G., Dommen, J., Baltensperger, U. and Prévôt, A S H: Characterization of primary and secondary wood combustion products generated under different burner loads, *Atmos. Chem. Phys.*, 15, 2825-2841, 2015.
- 205 Cappellin, L., Karl, T., Probst, M., Ismailova, O., Winkler, P. M., Soukoulis, C., Aprea, E., Märk, T. D., Gasperi, F. and Biasioli, F.: On quantitative determination of volatile organic compound concentrations using proton transfer reaction time-of-flight mass spectrometry, *Environ. Sci. Technol.*, 46, 2283-2290, 2012.
- Cvetanović, R. J.: Evaluated chemical kinetic data for the reactions of atomic oxygen O (3P) with unsaturated hydrocarbons, *J. Phys. Chem. Ref. Data*, 16, 261-326, 1987.

- 210 Czech, H., Miersch, T., Orasche, J., Abbaszade, G., Sippula, O., Tissari, J., Michalke, B., Schnelle-Kreis, J., Streibel, T., Jokiniemi, J. and Zimmermann, R.: Chemical composition and speciation of particulate organic matter from modern residential small-scale wood combustion appliances, *Sci. Total Environ.*, 612, 636-648, 2018.
- Grosjean, E. and Grosjean, D.: Rate constants for the gas-phase reaction of ozone with 1, 1-disubstituted alkenes, *Int J Chem Kinet*, 28, 911-918, 1996.
- 215 Hartikainen, A., Yli-Pirilä, P., Tiitta, P., Leskinen, A., Kortelainen, M., Orasche, J., Schnelle-Kreis, J., Lehtinen, K. E., Zimmermann, R., Jokiniemi, J. and Sippula O.: Volatile organic compounds from logwood combustion: emissions and transformation under dark and photochemical aging conditions in a smog chamber, *Environ. Sci. Technol.*, 52, 4979-4988, 2018.
- Herron, J. T.: Evaluated chemical kinetic data for the reactions of atomic oxygen O (3P) with saturated organic compounds in the gas phase, *J. Phys. Chem. Ref. Data*, 17, 967-1026, 1988.
- 220 Herring, C. L., Faiola, C. L., Massoli, P., Sueper, D., Erickson, M. H., McDonald, J. D., Simpson, C. D., Yost, M. G., Jobson, B. T. and VanReken, T. M.: New methodology for quantifying polycyclic aromatic hydrocarbons (PAHs) using high-resolution aerosol mass spectrometry, *Aerosol Sci. Tech.*, 49, 1131-1148, 2015.
- Jayne, J. T., Leard, D. C., Zhang, X., Davidovits, P., Smith, K. A., Kolb, C. E. and Worsnop, D. R.: Development of an aerosol mass spectrometer for size and composition analysis of submicron particles, *Aerosol. Sci. Technol.*, 33, 49-70, 2000.
- 225 Keller-Rudek, H., Moortgat, G. K., Sander, R. and Sörensen, R.: The MPI-Mainz UV/VIS Spectral Atlas of Gaseous Molecules of Atmospheric Interest, [online] Available from: [www.uv-vis-spectral-atlas-mainz.org](http://www.uv-vis-spectral-atlas-mainz.org), 2015.
- Kroll, J. H., Donahue, N. M., Jimenez, J. L., Kessler, S. H., Canagaratna, M. R., Wilson, K. R., Altieri, K. E., Mazzoleni, L. R., Wozniak, A. S., Bluhm, H., Mysak, E. R., Smith, J. D., Kolb, C. E. and Worsnop, D. R.: Carbon oxidation state as a metric for describing the chemistry of atmospheric organic aerosol, *Nat. Chem.*, 3, 133, 2011.
- 230 Lehtinen, K. E., Korhonen, H., Maso, M. D. and Kulmala, M.: On the concept of condensation sink diameter, *Boreal Environ. Res.*, 8, 405-412, 2003.
- Miersch, T., Czech, H., Hartikainen, A., Ihalainen, M., Orasche, J., Abbaszade, G., Tissari, J., Streibel, T., Jokiniemi, J., Sippula, O. and Zimmermann, R.: Impact of photochemical ageing on Polycyclic Aromatic Hydrocarbons (PAH) and oxygenated PAH (Oxy-PAH/OH-PAH) in logwood stove emissions, *Sci. Total Environ.*, 686, 382-392, 2019.
- 235 Onasch, T. B., Trimborn, A., Fortner, E. C., Jayne, J. T., Kok, G. L., Williams, L. R., Davidovits, P. and Worsnop, D. R.: Soot Particle Aerosol Mass Spectrometer: Development, Validation, and Initial Application, *Aerosol Sci. Tech.*, 46, 804-817, 2012.
- Orasche, J., Schnelle-Kreis, J., Abbaszade, G. and Zimmermann, R.: In-situ derivatization thermal desorption GC-TOFMS for direct analysis of particle-bound non-polar and polar organic species, *Atmos. Chem. Phys.*, 11, 8977-8993, 2011.

- 240 Palm, B. B., Campuzano-Jost, P., Ortega, A. M., Day, D. A., Kaser, L., Jud, W., Karl, T., Hansel, A., Hunter, J. F., Cross, E. S., Kroll, J. H., Peng, Z., Brune, W. H. and Jimenez, J. L.: In situ secondary organic aerosol formation from ambient pine forest air using an oxidation flow reactor, *Atmos. Chem. Phys.*, 16, 2943-2970, 2016.
- Paulson, S. E., Orlando, J. J., Tyndall, G. S. and Calvert, J. G.: Rate coefficients for the reactions of O (3P) with selected biogenic Hydrocarbons, *Int J Chem Kinet*, 27, 997-1008, 1995.
- 245 Peng, Z., Day, D. A., Ortega, A. M., Palm, B. B., Hu, W., Stark, H., Li, R., Tsigaridis, K., Brune, W. H. and Jimenez, J. L.: Non-OH chemistry in oxidation flow reactors for the study of atmospheric chemistry systematically examined by modeling, *Atmos. Chem. Phys.*, 16, 4283-4305, 2016.
- Peng, Z. and Jimenez, J. L.: Modeling of the chemistry in oxidation flow reactors with high initial NO, *Atmos. Chem. Phys.*, 17, 11991-12010, 2017.
- 250 Pieber, S. M., El Haddad, I., Slowik, J. G., Canagaratna, M. R., Jayne, J. T., Platt, S. M., Bozzetti, C., Daellenbach, K. R., Fröhlich, R., Vlachou, A., Klein F., Dommen, J., Miljevic, B., Jiménez J. L., Worsnop D. R., Baltensperger, U. and Prévôt A. S. H.: Inorganic salt interference on CO<sub>2</sub> in aerodyne AMS and ACSM organic aerosol composition studies, *Environ. Sci. Technol.*, 50, 10494-10503, 2016.
- Stedman, D. H. and Niki, H.: Ozonolysis rates of some atmospheric gases, *Environ. Lett.*, 4, 303-310, 1973.
- 255 Tang, M. J., Shiraiwa, M., Pöschl, U., Cox, R. A. and Kalberer, M.: Compilation and evaluation of gas phase diffusion coefficients of reactive trace gases in the atmosphere: Volume 2. Diffusivities of organic compounds, pressure-normalised mean free paths, and average Knudsen numbers for gas uptake calculations, *Atmos. Chem. Phys.*, 15, 5585-5598, 2015.
- Toby, S., Van de Burgt, L J and Toby, F. S.: Kinetics and chemiluminescence of ozone-aromatic reactions in the gas phase, *J. Phys. Chem.*, 89, 1982-1986, 1985.
