# Supplementary material for: Photochemical transformation of residential wood combustionemissions: dependence of organic aerosol composition on OHexposure
Source: Copernicus journal article supplement (doi:10.5194/acp-2019-1078), 2019-11-29
Supplement: Supplementary file 1 [file acp-2019-1078-supplement.zip]

## Sheet: TableS12
Hartikainen et al.: Photochemical transformation of residential wood combustion emissions: dependence of organic aerosol composition on OH exposure
Table S12: Secondary concentrations (ng m-3) of compounds measured by IDTD-GC-ToFMS. Normalised to dry, 13 % O2 flue gas conditions.
			Masonry heater, S-5%					Masonry heater, S-22%					Chimney stove, B-17%										Chimney stove, S-22%
			Exp.1	Exp.2	Exp.3	Exp.4	Exp.5	Exp.1	Exp.2	Exp.3	Exp.4	Exp.5	Exp.1A	Exp.1B	Exp.2A	Exp.2B	Exp.3A	Exp.3B	Exp.4A	Exp.4B	Exp.5A	Exp.5B	Exp.1	Exp.2	Exp.3	Exp.4	Exp.5
Group	Compound	Formula	0 eqv.d	6.8 eqv.d	O3	1.7 eqv.d	0.9 eqv.d	0 eqv.d	4 eqv.d	O3	1.5 eqv.d	0.7 eqv.d	0 eqv.d	0 eqv.d	3.3 eqv.d	4 eqv.d	O3	O3	0.9 eqv.d	0.3 eqv.d	5.9 eqv.d	5.8 eqv.d	0 eqv.d	3.5 eqv.d	O3	0.6 eqv.d	4.9 eqv.d
PAH	Phenanthrene	C14H10	1617.82	1155.55	2508.73	679.925	289.144	762.535	<9.83	<9.94	<10.92	449.184	914.247	437.977	384.119	210.05	587.774	2338.46	839.137	1371.6	315.243	199.999	263.469	108.047	535.063	763.705	<2.27
	Anthracene	C14H10	463.467	<19.23	193.894	248.151	74.5086	316.568	<10.88	<11	<12.09	<15.37	147.005	42.1466	<5.61	<4.81	70.6303	397.842	739.966	1092.28	74.2719	52.2779	24.7404	<4.93	522.762	255.72	<2.45
	Fluoranthene	C16H10	1548.73	198.66	1766.77	528.349	333.595	885.003	63.5207	73.8175	105.272	230.542	3302.57	1034.11	324.631	300.488	540.687	1465.33	1039	993.784	205.21	160.671	988.544	154.152	1223.88	891.566	147.565
	Acephenanthrylene	C16H10	86.9361	<12.82	34.8435	23.256	<4.57	36.2782	<7.37	<7.45	<8.19	<9.92	408.793	106.887	<3.74	<3.21	10.554	19.1328	<3.36	<3.23	<1.82	<1.53	107.101	<3.34	<3.9	<3.28	<1.63
	Pyrene	C16H10	1263.74	366.058	573.892	296.222	216.752	690.903	57.5547	61.3962	118.138	177.988	2537.34	769.067	217.554	208.592	290.64	566.393	390.58	344.002	101.23	71.4624	787.193	101.712	463.311	311.011	82.2399
	Benzo[a]fluorene	C17H12	47.4982	<24.02	33.2448	<12.04	<8.59	44.8278	<13.69	<13.84	<15.21	<18.84	75.7174	25.5487	<6.97	<5.98	17.0487	<6.23	<6.26	<6.03	<3.36	<2.83	37.6996	<6.16	41.616	<6.05	<3.09
	Benzo[b]fluorene	C17H12	44.0438	<24.02	<10.74	<12.04	<8.59	26.5732	<13.69	<13.84	<15.21	<18.84	33.5291	13.5564	<6.97	<5.98	13.639	<6.23	<6.26	<6.03	<3.36	<2.83	18.1001	<6.16	11.4803	<6.05	<3.09
	Benzo[c]phenanthrene	C18H12	48.6497	<25.76	77.0656	25.5513	39.4557	29.8082	<14.39	<14.55	<15.99	<20.33	103.709	98.1972	20.5656	<6.42	<7.14	45.2507	17.0879	25.1386	13.7541	8.82489	76.3631	12.4941	61.0914	33.0017	14.1733
	Benzo[ghi]fluoranthene	C18H10	227.128	<16.86	359.503	82.2839	124.04	112.07	15.0905	26.262	<10.53	<13.39	475.248	426.68	51.1592	57.4721	225.692	236.883	57.0613	113.932	53.9159	39.6161	282.747	18.1252	191.884	140.301	53.5434
	Benz[a]anthracene	C18H12	158.039	<16.86	99.6113	38.4569	72.8152	79.4885	<9.48	<9.58	<10.53	18.3442	284.947	233.762	21.0755	21.8802	188.348	192.847	22.8856	91.8809	17	14.4364	203.492	8.97463	49.4062	27.8182	37.4454
	Chrysene	C18H12	248.142	<19.83	128.716	92.2446	281.524	129.631	<11.23	63.8805	<12.48	127.913	403.759	537.912	82.2626	76.5808	363.706	285.474	128.769	109.522	56.6667	66.6663	460.535	30.4433	465.361	321.378	134.15
	2,2'-Binaphthalene	C20H14	<12.95	<26.32	<11.76	<13.17	<9.4	<9.7	<14.74	<14.91	<16.38	<20.82	<4.53	18.1621	<7.65	<6.56	25.8166	<6.83	<6.87	<6.62	<3.69	<3.12	22.7054	<6.86	<8	<6.74	<3.38
	sum Benzo[b,j,k]fluoranthene	C18H10	388.622	<18.4	479.61	119.961	378.47	189.478	37.5509	152.958	103.322	151.215	1067.29	591.79	115.576	112.173	720.917	405.434	193.764	364.583	116.084	111.75	548.358	34.3147	668.316	526.991	223.972
	Benz[e]pyrene	C20H12	137.601	<23.55	118.058	45.4727	102.873	51.2978	<13.34	50.7495	42.4986	66.4356	443.027	250.273	62.3768	49.0117	212.703	119.96	87.1177	169.061	48.4693	52.7575	229.196	18.1252	235.756	267.815	82.8232
	Benz[a]pyrene	C20H12	102.769	<25.8	60.6686	30.7049	48.6846	26.5732	<14.74	<14.91	<16.38	<20.33	364.491	134.695	20.7356	18.0877	44.3266	22.0179	17.6982	42.6327	17.4401	13.1414	190.64	<6.69	49.6112	27.991	36.3372
OH-PAH	1,8-Dihydroxynaphthalene	C10H8O2	<101.33	<205.78	<92.23	<103.07	<73.66	<76.48	<116.16	19980.4	22808.9	22013	833.697	186.835	1988.58	850.412	464.374	<53.15	923.051	3307.71	3554.05	1208.63	758.276	<52.97	231.655	2436.25	11898.5
	1,5-Dihydroxynaphthalene	C10H8O2	<101.33	<205.78	<92.23	275.868	<73.66	<76.48	<116.16	1018.54	2128.83	<163.11	2909.88	<30.42	3093.35	<51.05	<56.83	1463.81	<53.4	5659.86	<28.94	839.324	<32.24	<52.97	<61.71	1814.23	<26.36
	4-Hydroxyphenanthrene	C14H10O	<142.78	<290.08	<129.54	<145.51	<103.72	<107.68	<163.54	<165.38	1216.47	1060.99	<49.74	<42.93	<83.96	<72.06	8053.48	5026.17	1214.46	5689.26	616.182	173.141	<45.41	162.247	2931.57	5373.58	1061.54
	9-Hydroxyphenanthrene	C14H10O	<875.12	<1776.86	4685.42	2052.77	2184.46	<658.55	<1000.19	5358.86	10449.2	9568.71	1137.77	<262.44	<513.29	<440.52	828.08	<458.58	<460.76	<443.97	<249.22	<210.07	2966.7	<457.53	<533.01	<449.24	2502.19
	3-Hydroxyphenanthrene	C14H10O	296.504	<205.78	<92.23	<103.07	203.629	<76.48	<116.16	229.615	<129.06	<163.11	188.287	154.682	<59.49	<51.05	162.369	<53.15	<53.4	<51.45	<28.94	<24.36	487.31	<52.97	189.834	<52.01	670.751
O-PAH	9H-Fluoren-9-one	C13H8O	618.916	1254.49	2418.55	857.485	1807.68	4898.71	2976	9795.01	14231.2	13782.9	12485.3	4701.3	6220.68	3034.06	6819.48	23232.7	5446.76	18670.2	2459.22	1074.33	7657.73	2797.97	28905.7	31273.9	5832.62
	1H-Phenalen-1-one	C13H8O	<11.34	<22.99	799.35	405.357	229.029	<8.55	<12.98	489.75	1060.52	728.809	2406.44	831.635	1468.49	716.213	896.275	1943.65	422.62	<5.73	411.521	466.185	607.264	547.276	1674.89	1238.86	1364.83
	4-Hydroxy-9-fluorenone	C13H8O2						<8.55	<12.98	<13.13	<14.43	996.535	996.812	964.592	1453.19	927.722	961.222	2353.64	778.109	1301.03	566.667	575.536	515.157	733.808	2275.55	1969.74	2239.72
	Xanthone	C13H8O2	<30.8	<62.13	<27.83	511.026	187.965	399.753	<35.09	<35.49	1130.7	<49.08	1651.28	877.692	1852.61	1152.36	746.896	2809.19	945.936	<15.58	420.874	315.586	1210.24	1340.91	4899.61	<15.72	1353.17
	9,10-Anthracenedione	C14H8O2	<23.29	<47.09	1615.1	1113	660.417	<17.56	782.603	961.756	4171.88	2240.96	2658.16	1564.2	2311.51	1823.35	2614.13	5496.89	1334.99	2631.47	1386.41	1472.41	1178.11	1569.68	6232.15	4457.83	5342.68
	Cyclopenta(def)phenanthrenone	C15H18O	621.795	<20.82	754.259	332.167	165.528	346.607	375.509	266.878	729.104	545.367	2033.9	912.452	1235.64	530.96	594.269	1439.52	328.026	498.362	171.651	182.733	574.062	418.816	1459.63	908.844	468.359
	Naphthalaldehydic acid	C12H8O3	<45.48	<92.21	5058.45	3923.64	4182.64	<34.2	6738.11	23848.7	86946.6	78830.3	641.383	<13.64	20395.7	2304.72	30525.3	44947	12678.6	69535.4	1991.59	1467.62	88.2513	3325.89	50636.2	102979	23330.5
	1,8-Naphthalic anhydride	C12H6O3	3224.12	<92.21	9592.2	5699.24	3839.73	3697.14	7053.95	4932.99	25070.3	21120.6	8558.48	5978.73	13495.1	3938.44	13768.9	38265.7	12404	17200.1	3988.68	5131.87	1884.98	4082.57	22140.5	33692.9	27821.6
	Benzo[b]naphtho[2,1-d]furan	C16H10O	529.677	<11.4	267.68	180.158	114.726	189.709	<6.32	<6.39	<7.02	139.812	306.092	478.82	193.759	154.62	191.595	645.354	221.227	321.951	66.5696	64.2682	204.563	129.692	489.961	466.517	111.403
	2,3-5,6-Dibenzoxalene	C16H10O	138.464	<30.47	81.9846	58.4649	41.2337	136.332	<17.2	<17.39	<19.1	<24.29		226.81	70.0252	78.0395	119.828	261.178	117.479	136.866	41.2071	26.6665	168.149	48.5686	217.305	146.521	30.9712
	Benzo[b]naphtho[2,3-d]furan	C16H10O	253.036	<19.31	137.734	89.2131	73.6619	86.8828	<10.88	<11	<12.09	<15.37	262.796	229.417	<5.61	<4.81	<5.36	<5.01	<5.03	<4.85	<2.7	6.37886	68.7589	16.3655	<5.74	<4.84	24.322
	Benzo[kl]xanthene	C16H10O	331.048	<22.99	33.3677	52.8349	33.3172	67.0106	<12.98	<13.13	<14.43	<18.34	459.137	179.883	168.604	98.6069	96.6093	308.251	51.8739	120.401	34.8803	35.1557	105.923	70.5652	175.484	165.7	104.987
	11H-Benzo[a]fluoren-11-one	C17H10O	37.135	<30.47	24.5544	<15.29	30.0575	<11.32	<17.2	<17.39	63.5529	<24.29	190.3	69.8678	44.8705	30.6323	318.242	496.543	112.139	124.37	24.0971	29.1605	154.226	11.0863	356.708	186.607	72.9077
	7H-Benzo[c]fluorene-7-one	C17H10O	154.009	<30.47	145.933	63.6618	105.413	<11.32	<17.2	51.4593	<19.1	<24.29	62.1245	70.1285	20.3957	10.6484	110.573	167.033	37.8374	58.5097	11.6084	4.60429	54.7287	<7.92	160.724	80.3446	28.4632
	11H-Benzo[b]fluoren-11-one	C17H10O	201.795	<42.74	159.05	71.024	143.514	<15.94	<24.22	104.338	156.348	236.491	274.878	290.247	97.3894	56.7427	487.106	751.647	176.982	260.207	43.0777	44.4122	253.83	<11.09	604.764	355.935	155.731
	7H-Benzo[de]anthracen-7-one	C17H10O	225.688	<42.74	293.505	124.725	246.386	<15.94	<24.22	199.804	367.281	575.114	379.594	378.885	192.059	82.1238	449.761	1287.67	288.358	471.9	66.5696	94.0043	321.303	39.066	1033.22	749.883	281.132
	Naphtho[2,1,8,7-klmn]xanthene	C18H10O	<6.16	<12.51	<5.57	<6.28	<4.49	<4.62	<7.02	<7.1	<7.8	<9.92	57.9963	69.694	<3.57	<3.06	31.4995	30.5214	18.7662	25.4326	11.0583	15.0599	62.9755	<3.17	29.3157	27.4727	96.8214
	Benz[a]anthracene-7,12-dione	C18H10O2	<43.47	<88.25	182.416	<44.17	49.5313	<32.81	<49.83	<50.39	<55.37	<69.91	63.2321	39.4527	<25.49	<21.88	186.724	154.885	<22.89	98.6433	<12.38	<10.46	39.5203	<22.7	114.803	103.498	<11.32
	Phenanthro[3,4-c]furan-1,3-dione	C16H8O3	<43.47	<88.25	<39.52	<44.17	44.8745	<32.81	<49.83	86.9484	72.9104	<69.91	78.436	<13.04	58.1277	<21.88	172.111	42.3656	<22.89	46.749	<12.38	<10.46	17.3504	<22.7	66.2166	92.6122	717.412
	6H-Benzo[cd]pyren-6-on	‎C19H10O	<43.47	<88.25	303.343	<44.17	147.747	<32.81	<49.83	<50.39	<55.37	<69.91	506.461	257.225	231.151	997.739	784.24	429.73	279.204	379.284	<12.38	148.201	231.338	<22.7	334.158	525.263	1808.11
Alkylated PAH	3,6-Dimethylphenanthrene	C16H14	219.355	<23.82	87.3136	<11.95	<8.51	<8.78	<13.34	<13.49	<14.82	<18.84	200.369	18.9442	<6.97	<5.98	25.4919	<6.23	<6.26	<6.03	<3.36	<2.83	38.5564	<6.16	90.2021	<6.05	<3.03
	Retene	C18H18	4545.43	<36.61	1123.19	779.532	723.919	2250.63	435.169	560.729	1438.71	2389.7	2315.82	550.947	1232.24	771.643	1039.16	1822.17	340.232	388.105	52.2654	45.2276	910.36	673.977	2439.56	775.8	468.942
	2-/8-Methylfluoranthene	C17H12	128.389	<24.02	31.4411	<12.04	<8.59	58.9232	<13.69	<13.84	<15.21	<18.84	81.8594	47.7082	<6.97	<5.98	<6.66	56.3356	<6.26	<6.03	<3.36	<2.83	58.5843	<6.16	32.3908	32.1378	<3.09
	1-/3-/7-Methylfluoranthene	C17H13	54.9828	<24.02	68.8671	<12.04	<8.59	47.8317	<13.69	<13.84	<15.21	<18.84	77.7312	58.4838	<6.97	<5.98	51.4708	62.4095	<6.26	<6.03	<3.36	<2.83	50.873	<6.16	54.9413	14.1683	<3.09
	4-Methylpyrene	C17H12	<11.83	<24.02	<10.74	<12.04	<8.59	<9.01	<13.69	<13.84	<15.21	<18.84	31.8174	23.2024	<6.97	<5.98	8.60554	<6.23	<6.26	<6.03	<3.36	<2.83	20.6705	<6.16	<7.18	<6.05	<3.09
	2-Methylpyrene	C17H12	50.3769	<24.02	<10.74	<12.04	<8.59	<9.01	<13.69	<13.84	<15.21	<18.84	36.8518	28.764	<6.97	<5.98	10.7163	13.0589	<6.26	<6.03	<3.36	<2.83	29.7741	<6.16	10.0452	<6.05	<3.09
	1-Methylpyrene	C17H12	20.6689	<24.02	<10.74	<12.04	<8.59	<9.01	<13.69	<13.84	<15.21	<18.84	68.7699	43.1025	<6.97	<5.98	14.4508	24.5994	<6.26	<6.03	<3.36	<2.83	47.66	<6.16	24.6006	<6.05	<3.09
Alkane	Octadecane	C18H38	<216.76	<439.27	<196.76	<220.43	<157.48	7486.71	<248.47	3584.41	<276.05	12989.7	4520.89	1581.58	<127.3	<109.26	<121.61	5390.6	13868.6	9070.48	<61.62	<52.28	1499.42	5314.39	<132.02	11092.7	<56.34
	Nonadecane	C19H40	7611.23	6454.49	6833.42	3473.25	12759.6	18531.9	10352.8	7275.28	14231.2	33416.1	6081.56	3058.89	<130.87	5134.56	10115.6	10462.3	18766.2	5703.96	2833.33	1342.92	1895.69	12670.1	<135.71	3922.2	1411.49
	Eicosane	C20H42	13633.4	15263.6	17393	11329.2	15147.3	33274.3	25478.5	22713.1	37429.9	41348.7	6031.21	3745.4	13529.1	5382.54	12112.7	12193.4	28072.9	13054.4	3400	1606.71	2034.92	12019	5781.14	11853	1988.92
	Heneicosane	C21H44	23677.1	21864.5	25640.7	17071.7	17183.5	52453.2	37901.8	43296.8	73300.3	47843.6	5356.6	6195.99	18186.2	5995.18	15100.3	17158.8	11091.9	7732.69	3289.97	1640.28	2334.81	12106.9	6990.66	8345.47	2006.42
	Docosane	C22H46	20130.6	15698.9	20516.7	15417.4	15168.4	15643.5	12002.3	22251.7	27487.6	13485.4	2557.48	3024.13	5081.92	2800.67	4903.53	5193.2	2044.44	1984.63	918.771	772.178	2302.67	5507.96	2993.07	2142.52	1014.88
	Tricosane	C23H48	4784.36	3854.49	7526.19	4529.95	4555.19	9450.81	7159.24	12989	17623.3	9618.29	1872.8	2189.89	3569.24	2202.61	3166.19	3219.18	1421.96	1224.59	1111.33	863.305	1852.85	3114.72	2665.06	1969.74	1318.17
	Tetracosane	C24H50	2193.55	1626.48	3455.65	2187.02	2815.24	4921.82	4913.2	8588.38	9240.52	6891.46	1470.05	2155.13	2362.5	1765.01	3052.53	2156.24	1540.96	1602.4	1215.86	1026.37	2645.4	2234.86	2562.56	1969.74	1633.13
	Pentacosane	C25H52	1764.63	1452.36	2521.03	2039.77	2696.7	2449.35	3011.09	4968.48	5185.61	4625.7	668.569	1729.31	1118.36	1037.12	1566.86	1504.81	945.936	679.183	869.256	815.343	1467.29	955.534	2111.55	1696.74	1300.67
	Hexacosane	C26H54	1609.18	1393	1881.55	1710.64	2734.8	1982.59	2951.43	4897.5	3434.98	3425.9	588.018	1468.61	798.831	765.808	957.975	1316.52	903.216	835.013	638.188	685.848	1349.47	689.814	1625.69	1917.9	787.403
	Heptacosane	C27H56	1879.78	1875.8	1688.88	1359.85	3170.85	2269.12	2940.9	5003.97	3158.15	3391.19	470.213	1529.44	586.376	700.167	1143.07	1974.02	863.548	639.491	417.573	613.906	1488.71	508.562	2091.05	2315.31	468.942
	Octacosane	C28H58	1704.18	2101.37	651.778	848.823	2557	1361.01	2270.6	2867.52	2362.77	1750.13	334.284	643.062	356.924	392.385	453.008	842.756	611.807	488.071	281.133	445.081	604.05	337.868	826.169	1848.79	236.221
	Nonacosane	C29H60	1502.67	2133.03	430.419	511.026	2358.03	1226.99	1863.51	2147.09	1968.97	1105.61	228.562	423.204	256.646	<136.1	324.737	687.871	498.905	327.831	200.259	375.058	453.038	223.486	615.014	1574.06	124.235
	Triacontane	C30H62	1439.34	2188.43	399.265	498.034	2374.96	1143.8	2274.11	2065.47	2319.88	1056.03	279.913	462.309	302.536	334.038	352.34	826.053	569.087	383.695	218.414	451.316	442.328	299.154	592.464	1779.68	169.729
	Hentriacontane	C31H64	875.118	1464.23	342.286	407.089	1765.35	619.271	1561.7	1139.2	1216.47	684.188	165.128	271.998	203.957	<138.14	224.069	578.541	425.671	270.497	<78.12	234.051	306.309	167.878	453.061	1187.03	<71.16
	Dotriacontane	C32H66	454.831	641.096	<241.44	294.057	1045.66	332.743	996.678	617.511	<338.43	16063.5	127.874	156.42	165.375	<133.91	<149.05	381.138	274.627	179.351	<75.92	131.414	215.273	<139.02	266.506	647.94	<68.82
Alkanol	Dodecanol	C12H26O	5573.12	8057.23	6271.82	6604.37	4762.62	9566.35	<99.67	5891.2	<110.73	<139.81	<30.31	5240.08	<51.16	<43.91	6705.82	6605.38	<45.92	<44.25	<24.81	<20.91	<27.63	<45.4	<52.89	<44.58	<22.63
	Tetradecanol	C14H30O	7467.29	11326	17204.5	15504	4677.96	10675.5	13476.2	60686.5	<110.73	<139.81	1832.52	<26.16	<51.16	<43.91	6770.77	2733.26	<45.92	<44.25	<24.81	2681.04	<27.63	7126.91	3218.58	<44.58	<22.63
	Hexadecanol	C16H34O	38795.9	60686.4	102870	72158.7	65135.8	47831.7	70890.5	130600	113070	172039	14096.3	26417.7	<51.16	<43.91	75339	38569.4	51111.1	<44.25	94627.9	26858.4	30095.4	60710.7	<52.89	<44.58	35229
	Octadecanol	C18H38O	53232.5	56016.7	162190	81019.3	70651.9	43441.4	114407	125987	74859.9	120972	22252.1	36150.5	53708.6	29027.8	80534.8	60435.5	55383	75268.8	94077.7	46234.8	35129.2	59302.9	77696.8	136327	42286.5
Anhydrous sugars	Galactosan	C6H10O5	114.571	100.913	746.06	489.373	2396.13	86.4206	894.905	1064.67	4522.79	7982.19	255.748	274.605	1279.83	376.34	746.896	616.502	645.373	345.472	215.113	<2.4	556.926	397.699	1506.79	941.673	1254.01
	Mannosan	C6H10O5	555.585	184.414	3918.87	1710.64	15524	714.01	1112.49	7381.75	27721.6	40555.5	874.979	599.611	2192.54	633.068	5049.66	1477.48	843.714	479.251	224.466	<5.66	2013.5	913.3	4776.61	1987.02	2163.9
	Levoglucosan	C6H10O5	8051.66	3688.28	26571.2	19808.8	84613.8	14072.2	8808.67	166089	210154	211206	14197	14686.1	66455.9	15899.6	80210.1	31888.1	26547.2	12069.5	18980.6	3553.94	25061.7	13849.1	61501.4	20561.3	53660.1
Guaiacyls	Vanillin	C8H8O3	2233.85	1693.76	1529.01	580.318	1342	16798.9	1259.89	1746.07	2234.1	2840.87	4500.76	1850.97	1475.29	656.407	1320.06	665.094	559.933	345.472	226.117	<58.51	4648.19	717.97	1865.54	668.674	244.387
	Acetovanillone	C9H10O3	<27.72	<56.19	<25.17	<28.19	340.792	496.803	<31.58	<31.94	<35.09	<44.62	1540.53	344.125	501.394	271.315	<15.59	<14.58	<14.65	<14.11	<7.92	<6.67	1756.46	248.122	<16.81	<14.17	<7.17
	Methylvanillate	C9H10O4	68.2247	<56.19	<25.17	<28.19	<20.11	<20.8	<31.58	<31.94	<35.09	<44.62	353.415	74.7342	<16.32	<14	<15.59	<14.58	<14.65	<14.11	<7.92	<6.67	537.648	<14.43	<16.81	<14.17	<7.17
	Vanillic acid	C8H8O4	518.162	163.44	647.679	1537.41	4021.77	1072.17	<35.8	1501.19	12788.6	8428.4	1006.88	1807.52	865.117	668.076	1753.58	561.837	555.356	201.403	368.058	84.412	3277.3	482.166	2644.56	1104.09	4561.11
	Coniferaldehyde	C10H10O3	1171.62	<534.25	799.35	593.31	8466.89	3697.14	<301.46	8162.51	<334.92	<423.4	3322.71	2302.86	<154.5	<132.59	<147.59	<138.03	<138.69	<133.63	<74.82	633.09	5119.44	<137.61	<160.31	879.471	<68.24
Nitrophenols	4-Nitrophenol	C6H5NO3	593.008	3268.8	15216.3	5318.14	2760.21	586.921	989.659	2179.03	892.86	1100.65	443.027	848.146	3654.23	3471.66	31337.1	28851.1	12068.3	7923.81	9022.66	8441.2	692.944	1752.69	10967.8	4699.73	5704.3
	4-Nitrocresol	C7H7NO3	<78.59	<159.48	361.962	<80.12	<57.15	<59.39	<90.19	<91.21	<100.2	<126.43	<27.39	<23.64	<46.23	<39.68	537.44	<41.3	<41.5	<39.99	<22.39	<18.9	<25.06	<41.18	<47.97	<40.43	<20.41
	2-Methoxy-4-nitrophenol	C7H7NO4	128.677	143.257	230.787	85.3154	33.6135	880.381	<29.83	100.434	<33.14	<41.65	160.094	51.2711	<15.3	<13.13	126.81	78.2017	<13.73	<13.23	<7.37	176.018	25.7043	68.6295	<15.79	<13.3	<6.77
	4-Nitrocatechol	C6H5NO4	147.964	3723.89	1906.14	34957.7	18652.6	221.366	20179.2	20690.2	260060	242936	420.876	149.468	144129	38655.1	13525.3	1254.26	147383	23815.5	80323.7	34244.4	<26.24	33434.9	<50.23	<42.33	39778.4
	2,6-Dimethoxy-4-nitrophenol	C8H9NO5	178.766	<52.63	<23.57	182.757	171.454	<19.64	282.158	201.224	<33.14	483.394	769.257	101.673	467.401	157.538	527.698	<13.67	738.44	<13.23	284.984	43.2132	49.5878	147.641	113.163	174.512	117.819
Resin acids	Pimaric acid	C20H30O2	<53.26	<107.64	<48.37	<54.13	118.96	<39.98	<60.71	96.5305	<67.45	296.481	159.087	65.2621	<31.27	<26.84	67.7077	<27.94	<28.07	<27.05	<15.13	<12.76	136.018	<27.8	84.052	<27.3	<13.82
	Isopimaric acid	C20H30O2	624.673	<107.64	398.855	<54.13	728.152	82.9546	<60.71	376.185	237.836	4700.07	2436.65	682.167	<31.27	<26.84	199.713	<27.94	<28.07	<27.05	<15.13	<12.76	1638.65	<27.8	740.067	362.846	<13.82
	Dehydroabietic acid	C20H28O2	24396.8	382.679	70986.4	9124.85	64678.6	3812.67	582.565	95110.9	42888.5	265247	55479.1	22594.1	1517.78	633.068	76150.9	21714.3	1187	1040.83	<15.13	95.4431	43054.7	800.677	100862	28336.6	4654.43
	7-Oxodehydroabietic acid	C20H26O3	722.548	<107.64	4468.16	1455.13	8166.31	325.81	72.6452	5287.88	9045.57	21418.1	683.672	308.496	161.806	<26.84	16123.2	6529.46	369.22	305.78	<15.13	<12.76	964.981	79.7158	10291.2	2056.13
	Dehydroabietic acid, methyl ester	C21H30O2	109.102	15.3546	182.416	39.0199	200.665	113.225	15.0905	125.987	77.9791	466.041	<2.32	131.219	110.647	61.5564	571.537	785.054	<3.51	<3.38	<1.87	11.8944	167.078	41.3537	551.463	111.618	<1.69
	7-Oxodehydroabietic acid, methyl ester	C21H28O3	20.525	<13.26	147.982	35.2522	168.068	20.7964	<7.37	163.25	228.869	550.325	21.1445	15.642	<3.91	<3.35	305.253	308.251	23.3433	<3.38	<1.87	<1.58	27.3108	<3.34	342.358	66.3491	102.071
Polyol	2-Methyl-1,4-butanediol	C5H12O2	<9.5	<19.27	<8.61	1909.85	4398.55	<7.16	<10.88	<11	18247.1	12345.1	1208.26	1929.18	<5.61	4244.76	4952.24	3143.25	1525.7			<2.3	2966.7	<4.93	<5.74	<4.84	<2.45
	1,2,3-Butanetriol	C4H10O3	<35.41	<72.02	218.489	<35.99	592.682	<26.8	<40.71	<41.17	<45.23	<57.02	<12.28	<10.6	<20.74	<17.8	<19.81	<18.53	<18.61	<17.94	<10.07	<8.49	<11.25	<18.48	<21.53	<18.14	<9.22
	Erythritol	C4H10O4	<35.41	557.991	<32.14	692.917	457.212	<26.8	2396.94	<41.17	12866.5	4313.36	<12.28	<10.6		1086.72	<19.81	<18.53	1203.78	427.797	2085.11	508.391	<11.25		<21.53	1900.62	17614.5
	Threitol	C4H10O4	<9.5	55.4033	<8.61	214.371	188.812	<7.16	288.475	<11	3875.56	1239.47	<3.32	<2.87	1607.86	182.335	<5.36	<5.01	549.253	186.702	293.236	112.709	<3	962.573	<5.74	943.401	3581.23
Dicarboxylic acids	Oxalic acid	C2H2O4	<27.46	<55.8	<24.92	<27.93	<19.94	<20.8	610.641	<31.94	<35.09	<44.13	<9.57	<8.26	<16.15	<13.86	<15.43	<14.43	<14.49	<13.97	<7.81	<6.57	<8.78	<14.43	<16.81	<14.17	<7.12
	Succinic acid	C4H6O4	483.618	3522.07	386.148	1242.92	630.783	408.996	4702.64	393.93	7485.99	2588.02	184.259	318.924	3637.23	2523.52	813.467	296.103	2120.73	1675.91	4868.93	1424.45	1788.59	2797.97	893.821	1454.84	8340.64
	Glutaric acid	C5H8O4	1554.49	6866.05	2537.42	4122.86	1989.72	1917.89	8106.78	<219.68	14153.2	6296.51	997.818	1338.26	5319.87	4361.46	4286.53	7303.88	6346.93	4645.5			3159.48	3765.82	3690.09	4336.88	12540.1
	Adipic acid	C6H10O4	<189.7	1950.99	3640.12	2347.26	1977.02	954.324	1207.24	<219.68	2573.31	2751.63	510.488	1138.39	2991.37	2596.45	4107.93	6165.02	3081.92	3337.11	2459.22	1525.17	1906.4	2393.23	2829.07	2591.76	1149.03
	Azelaic acid	C9H16O4	2248.25	4907.15	15077	5240.19	6003.02		<217.23	7417.23	<241.35	<304.91	<65.95	<56.92	<111.33	<95.54	<106.35	<99.46	<99.93	<96.29	<54.08	<45.56	<60.41	<99.25	<115.62	<97.45	<49.29
	Decanedioic acid	C10H18O4	<189.7	2425.87	2311.97	775.201	1430.9	3674.03	<217.23	1306	<241.35	<304.91	361.47	<56.92	<111.33	1735.83	2451.77	<99.46	<99.93	<96.29	<54.08	211.03	<60.41	<99.25	1430.93	882.926	<49.29
Multifunctional acids/ anhydrids	Fumaric acid	C4H4O4	1070.87	5947.94	1344.55	9085.88	4957.36	1698.37	9124.52	1973.2	22146.1	12791.3	1762.04	1103.63	8889.12	4361.46	4091.69	2186.61	11274.9	4292.67	5666.67	2239.8	2913.15	4962.44	3280.08	7809.84	6474.2
	Maleic acid	C4H4O4	<27.46	<55.8	<24.92	740.555	284.487	<20.8	905.433	<31.94	2343.27	818.051	<9.57	<8.26	671.358	<13.86	<15.43	71.6722	593.499	586.567	454.434	93.5247	1488.71	<14.43	<16.81	882.926	<7.12
	Malic acid	C4H6O5	<716.79	57627.4	<651.78	20640.3	12552.2	8803.81	153713	2331.64	202356	69906.2	<248.7	<214.64	82262.6	58784.9	3734.48	<375.06	22275.3	10423	69320.4	21246.9	<228.13	111391	4776.61	21425.2	149898
	Tartaric acid	C4H6O6	<716.79	66480	<651.78	9835.09	4474.75	<540.71	309181	<830.45	90845.6	16708.1	<248.7	<214.64	127813	114069	<401.05	<375.06	17545.6	4983.62	91877.1	25659.3	<228.13	146058	<436.66	10470.7	64742
	cis-pinonic acid	C10H16O3	<716.79	93505	80750.8	41679	39371	35353.9	24109.8	37973.4	36143.3	<1150.23	<248.7	19118	<419.81	<360.29	<401.05	<375.06	<376.85	<363.11	<204.11	<172.18	19599.5	<374.82	<436.66	<368.03	<186.06
	3-Hydroglutaric acid	C5H8O5						<540.71	15336.2	<830.45	<912.35	15914.8	<248.7	<214.64	8515.2	6316.09	<401.05	<375.06	3844.77	<363.11	7867.32	1357.31	<228.13	7918.79	<436.66	<368.03	6590.86
	Quinic acid	C7H12O6	259.369	1559.21	176.677	357.285	<94.83	975.12	856.301	9085.23	3158.15	783.346	171.17	291.116	2260.52	3530.01	1401.24	120.264	366.169	283.728	207.411	292.564	350.221	360.745	590.414	380.125	265.384
	Butanoic acid, 4-hydroxy-	C4H8O3	58987	61406.7	42796	30778.5	35700.6	<540.71	<821.21	<830.45	<912.35	41993.3	6725.96	12948.1	11166.6	<360.29	33285.6	21410.6	15409.6	8820.56	12158.6	<172.18	13601.8	<374.82	15887.9	7187.82	6940.81
	Butanoic acid, 3,4-dihydroxy	C4H8O4						41130.7	23162.2	43651.7	51466.2	32275.8	<248.7	<214.64	18356.1	6316.09	<401.05	<375.06	21359.8	6336.11	20631.1	3563.53	<228.13	13461.9	<436.66	8189.96	59492.7
	3-Ketovaleric acid	C5H8O3						<540.71	<821.21	<830.45	125156	40258	<248.7	<214.64	47080	43322.9	<401.05	<375.06	15409.6	3498.82	16174.8	9640.24	1370.89	37834.2	<436.66	5632.76	20997.4
	Glutaric acid, 2-hydroxy-	C5H8O5						<540.71	89139.5	<830.45	200016	52057.8	<248.7	<214.64	67815.6	14732.7	2078.32	<375.06	28683.2	4130.96	60517.8	4215.8	<228.13	42057.6	2911.07	11334.6	96238.2
Fatty acids	Decanoic acid	C10H20O2	54234.3	97937.2	94470.9	54337.7	19766	55226	<217.23	144086	<241.35	102132	13190.1	30588.9	<111.33	<95.54	38643.7	70913	45923.7	28666.8	<54.08	<45.56	23883.6	<99.25	33825.8	<97.45	<49.29
	Dodecanoic acid	C12H24O2	118118	170460	458655	103968	45458.7	104906	68082.9	215419	131005	123451	24165.1	119053	64246.4	31799.3	113983	209550	77505.7	80120.1	41152.1	22877.6	72186.2	71621	90202.1	71878.2	<49.29
	Tridecanoic acid	C13H26O2	114.284	139.696	123.797	78.3863	86.3623	146.961	<11.93	112.146	<13.26	<16.86	<3.62	75.8639	110.817	<5.25	<5.85	<5.47	<5.49	38.3695	115.534	<2.54	102.603	<5.46	<6.36	56.8459	<2.74
	Tetradecanoic acid	C14H28O2	555.585	1654.18	934.625	1151.97	461.445	603.096	379.018	1341.49	970.839	837.882	153.046	656.966	1199.95	284.443	556.924	545.134	407.363	<5.29	215.664	204.795	466.961	506.802	<6.36	347.296	<2.74
	Tetradecanoic acid	C16H32O2	2798.08	7067.88	3677.01	4837.43	1748.41	3350.53	2140.75	9085.23	4873.69	3668.83	607.149	2867.71	4657.01	1546.2	2175.74	3371.02	2105.47	1617.1	819.741	829.732	1906.4	1659.43	2193.55	1779.68	694.081
	Heptadecanoic acid	C17H34O2	59.5886	233.881	98.7915	<10.7	<7.62	75.7913	<11.93	177.801	<13.26	<16.86	<3.62	<3.13	<6.12	<5.25	<5.85	<5.47	<5.49	<5.29	<2.97	<2.54	<3.32	<5.46	<6.36	<5.36	<2.74
	Oleic acid	C18H34O2	50.6647	427.397	60.6686	270.238	<7.62	71.1699	52.2905	153.313	88.5062	46.6041	<3.62	184.228	159.766	39.5303	<5.85	<5.47	52.4842	19.2582	<2.97	17.7937	69.4015	24.1083	<6.36	<5.36	<2.74
	Stearic acid	C18H36O2	512.405	728.158	471.412	414.018	298.458	670.106	368.49	1589.91	1157.99	743.682	114.784	328.483	589.775	328.203	326.361	809.349	363.117	292.549	109.482	121.822	345.937	311.472	393.609	361.119	91.5721
	Eicosanoic acid	C20H40O2	27.8656	<6.29	40.0495	19.3151	56.3048	19.8721	8.42263	98.6599	54.9752	216.164	<1.11	12.2529	17.8462	<1.6	49.1977	<1.67	<1.68	<1.62	<0.88	<0.72	36.8428	<1.58	85.487	104.88	<0.82
	Docosanoic acid	C22H44O2	118.889	<21.29	175.857	51.9688	257.817	64.6999	<11.93	295.625	162.586	654.441	168.149	62.2206	39.2617	<5.25	517.956	<5.47	<5.49	<5.29	<2.97	<2.54	168.149	<5.46	383.359	357.663	<2.74
	Tetracosanoic acid	C24H48O2	90.1026	70.0456	113.959	58.898	184.578	50.6046	17.8981	248.424	136.073	347.052	61.5204	51.9663	71.045	18.5253	483.858	58.3096	24.7164	<5.29	<2.97	<2.54	87.0732	<5.46	268.556	205.613	<2.74
